# Supplementary material for: Discovery of Next-Generation Tropomyosin Receptor Kinase (TRK) Inhibitors for Combatting Resistance Associated with Protein Mutation
Source: Research Square preprint supplement (doi:10.21203/rs.3.rs-597552/v1), 2021-06-17

**Supplementary Information**

for

**Discovery of Next-Generation Tropomyosin Receptor Kinase (TRK) Inhibitors for Combatting Resistance Associated with Protein Mutation**

Lin-Sheng Zhuo1,†, Ming-Shu Wang1,†, Feng-Xu Wu2,†, Hong-Chuang Xu1,†, Yi Gong1, Zhi-Cheng Yu1, Yan-Guang Tian1, Chao Pang1, Ge-Fei Hao1, Wei Huang1,*, and Guang-Fu Yang1,*

1. *Key Laboratory of Pesticide & Chemical Biology of Ministry of Education, International Joint Research Center for Intelligent Biosensor Technology and Health, College of Chemistry, Central China Normal University, Wuhan 430079, P.R. China*
2. *Hubei Key Laboratory of Wudang Local Chinese Medicine Research, School of Pharmaceutical Sciences, Hubei University of Medicine, Hubei, 442000, P. R. of China*

** Corresponding authors. E-mail address:* [*weihuangwuhan@126.com*](mailto:weihuangwuhan@126.com) *(W. Huang),* [*gfyang@mail.ccnu.edu.cn*](mailto:gfyang@mail.ccnu.edu.cn) *(G. Yang).*

*† L.Z., M.W., F.W. and H.X. contributed equally to this work*

Contents

[1 Fig. S1 S2](#_Toc73709928)

[2 Preparation of Key Intermediate Compounds S3](#_Toc73709929)

[3 Preparation of All Target Compounds S7](#_Toc73709930)

[4 Copies of NMR Data for all Target Compounds S17](#_Toc73709931)

[5 Copies of HPLC of Representative Compounds S43](#_Toc73709932)

# Fig. S1


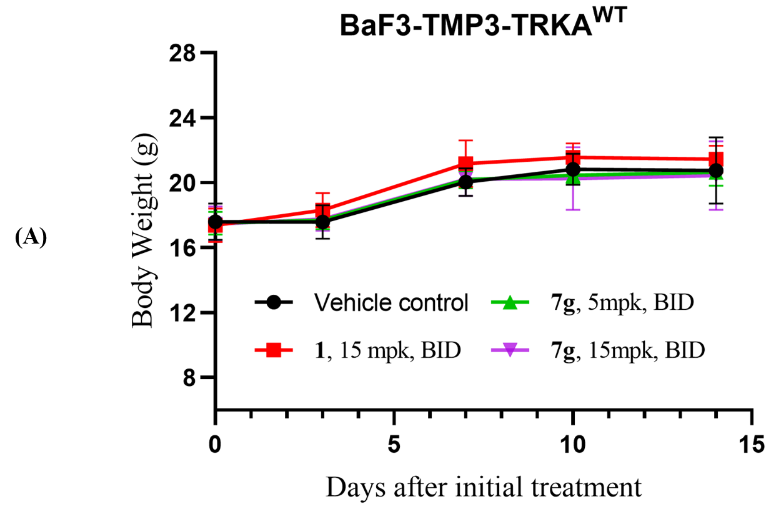


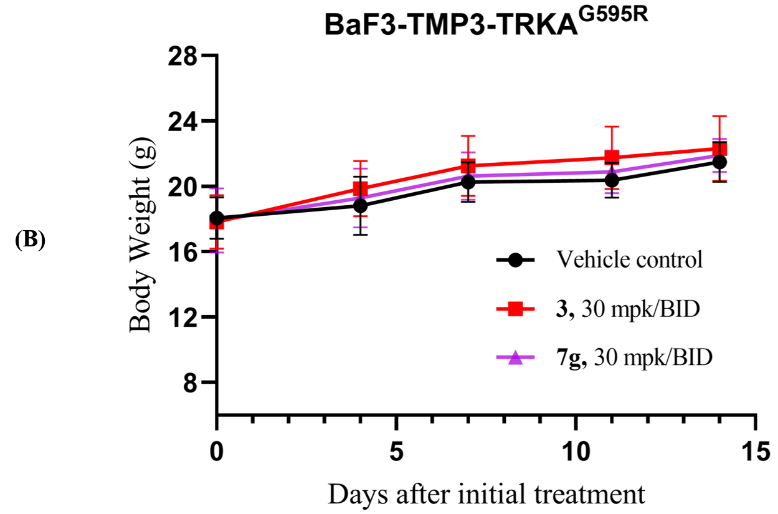


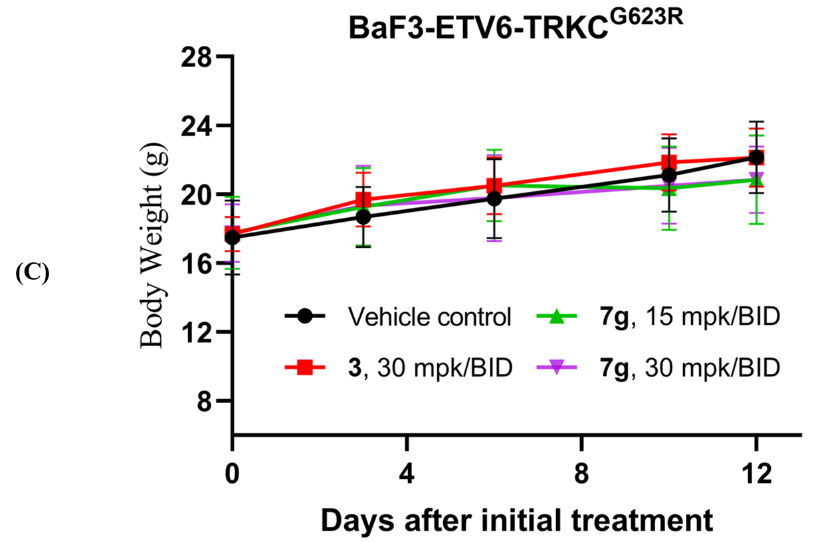


**Fig. S1:** Body weight of mice during treatment with **1** (Larotrectinib), **3** (Selitrectinib) and **7g** in the Ba/F3-TMP3-TRKAWT fusion (**A**), Ba/F3-TMP3-TRKAG595R fusion (**B**), and Ba/F3-ETV6-TRKCG623R fusion (**C**) xenograft model.

# Preparation of Key Intermediate Compounds

*(R)-5-(2-(2,5-difluorophenyl)pyrrolidin-1-yl)pyrazolo[1,5-a]pyrimidine* (**9**)

A mixture of (*R*)-2-(2,5-difluorophenyl)pyrrolidine hydrochloride **8** (6.0 g, 27.3 mmol), 5-chloropyrazolo[1,5-a]pyrimidine (27.3 mmol), DIPEA (55 mmol) in anhydrous n-butanol (20 mL) was heated at 140 °C for overnight. The reaction mixture was concentrated for further purification by column chromatography on silica gel (heptane/acetone = 5:1) to afford the intermediate **9** (7.22, 88%) as a pale-yellow solid. 1H NMR (600 MHz, CDCl3) δ 8.29 – 8.14 (m, 1H), 7.91 – 7.80 (m, 1H), 7.10 – 7.02 (m, 1H), 6.96 – 6.87 (m, 1H), 6.77 – 6.69 (m, 1H), 6.21 – 6.07 (m, 1H), 6.03 – 5.80 (m, 1H), 5.42 – 5.15 (m, 1H), 4.05 – 3.90 (m, 1H), 3.83 – 3.66 (m, 1H), 2.53 – 2.40 (m, 1H), 2.11 – 1.94 (m, 3H).

*(R)-5-(2-(2,5-difluorophenyl)pyrrolidin-1-yl)-3-iodopyrazolo[1,5-a]pyrimidine* (**10**)

A solution of **9** (7.0 g, 23.3 mmol) and N-iodosuccinimide (34.95 mmol) in acetonitrile (150 mL) was stirred at room temperature for 1h. The reaction mixture was concentrated under reduced pressure, and diluted with ethyl acetate (300 mL), wash with sodium hydroxide aqueous solution (2 mol/L) and brine (2×50mL), dried over Na2SO4, filtered, and concentrated. The residue was purified by chromatography (heptane/acetone = 5:1) to yield **10** (9.44g, 95%) as a pale-yellow solid. 1H NMR (600 MHz, CDCl3) δ 8.27 – 8.01 (m, 1H), 7.90 – 7.74 (m, 1H), 7.11 – 7.00 (m, 1H), 6.98 – 6.86 (m, 1H), 6.84 – 6.72 (m, 1H), 5.99 – 5.71 (m, 1H), 5.33 – 5.01 (m, 1H), 4.17 – 3.55 (m, 2H), 2.50 (s, 1H), 2.22 – 1.91 (m, 3H).

*(R)-N-(1-(2,5-difluorophenyl)ethyl)pyrazolo[1,5-a]pyrimidin-5-amine* (**13**)

The compounds **13** were prepared from (*R*)-1-(2,5-difluorophenyl)ethan-1-amine hydrochloride **12** and 5-chloropyrazolo[1,5-a]pyrimidine by following a similar procedure as described for **9**. 1H NMR (600 MHz, CDCl3) δ 8.22 (d, *J* = 7.6 Hz, 1H), 7.85 – 7.82 (m, 1H), 7.09 – 7.04 (m, 1H), 7.03 – 6.98 (m, 1H), 6.93 – 6.85 (m, 1H), 6.12 – 6.05 (m, 1H), 5.99 (d, *J* = 7.6 Hz, 1H), 5.42 – 5.29 (m, 1H), 5.22 – 5.12 (m, 1H), 1.58 (d, *J* = 7.2 Hz, 3H).

*(R)-N-(1-(2,5-difluorophenyl)ethyl)-3-iodopyrazolo[1,5-a]pyrimidin-5-amine* (**14**)

The compounds **14** were prepared from **13** by following a similar procedure as described for **10**. 1H NMR (400 MHz, CDCl3) δ 8.16 (d, *J* = 7.6 Hz, 1H), 7.81 (s, 1H), 7.19 – 7.08 (m, 1H), 7.06 – 6.97 (m, 1H), 6.95 – 6.86 (m, 1H), 6.00 (d, *J* = 7.6 Hz, 1H), 5.58 – 5.40 (m, 1H), 5.38 – 5.21 (m, 1H), 1.62 (d, *J* = 6.9 Hz, 3H).

*(R)-N-(1-(5-fluoro-2-((4-methoxybenzyl)oxy)phenyl)ethyl)pyrazolo[1,5-a]pyrimidin-5-amine* (**17**)

The compounds **17** were prepared from (*R*)-1-(5-fluoro-2-((4-methoxybenzyl)oxy)phenyl)ethan-1-amine hydrochloride **16** and 5-chloropyrazolo[1,5-a]pyrimidine by following a similar procedure as described for **9**. 1H NMR (600 MHz, CDCl3) δ 8.14 (d, *J* = 7.6 Hz, 1H), 7.83 (s, 1H), 7.42 – 7.31 (m, 2H), 7.08 – 7.00 (m, 1H), 6.97 – 6.81 (m, 4H), 6.07 (s, 1H), 5.79 (d, *J* = 7.6 Hz, 1H), 5.58 (d, *J* = 6.9 Hz, 1H), 5.37 (br, 1H), 5.06 (q, *J* = 11.0 Hz, 2H), 3.83 (s, 3H), 1.53 (d, *J* = 6.9 Hz, 3H).

*(R)-4-fluoro-2-(1-(pyrazolo[1,5-a]pyrimidin-5-ylamino)ethyl)phenol* (**18**)

A solution of **17** (5.0 g, 12.7 mmol) and TFA (44.45 mmol) in DCM (50 mL) was stirred at rt for 4 h. The mixture was dropwise added to ice water, and then extracted with EA. The organic layer was separated, washed with saturated brine (2×50mL), dried over Na2SO4, filtered, and concentrated. The residue was purified by chromatography (heptane/acetone = 4:1) to yield **18** (2.9 g, 85%) as a white solid. 1H NMR (400 MHz, DMSO-*d*6) δ 9.67 (s, 1H), 8.48 (d, *J* = 7.5 Hz, 1H), 7.78 (d, *J* = 8.1 Hz, 1H), 7.76 (d, *J* = 2.2 Hz, 1H), 7.03 (dd, *J* = 9.8, 3.1 Hz, 1H), 6.91 – 6.84 (m, 1H), 6.83 – 6.77 (m, 1H), 6.35 (d, *J* = 7.6 Hz, 1H), 5.94 (d, *J* = 2.2 Hz, 1H), 5.44 – 5.32 (m, 1H), 1.41 (d, *J* = 6.8 Hz, 3H).

*(R)-N-(1-(5-fluoro-2-(fluoromethoxy)phenyl)ethyl)-3-iodopyrazolo[1,5-a]pyrimidin-5-amine* (**19a**)

A mixture of **18** (3.0 g, 11.0 mmol), fluoroiodomethane (22.0 mmol), and Cs2CO3 (33.0 mmol) in DMF (50 mL) was heated at 100 °C for overnight. The reaction was allowed to cool and then diluted with ethyl acetate (300 mL), wash with saturated brine (2×50mL), dried over Na2SO4, filtered, and concentrated. The residue was used directly in next step without further purification. A solution of this residue (11.0 mmol) and N-iodosuccinimide (16.5 mmol) in acetonitrile (150 mL) was stirred at room temperature for 1h. The reaction mixture was concentrated under reduced pressure, and diluted with ethyl acetate (300 mL), wash with sodium hydroxide aqueous solution (2 mol/L) and brine (2×50mL), dried over Na2SO4, filtered, and concentrated. The residue was purified by chromatography (heptane/acetone = 6:1) to yield **19a** (4.2g, 90%) as a yellow solid. 1H NMR (600 MHz, CDCl3) δ 8.17 (d, *J* = 7.5 Hz, 1H), 7.82 (s, 1H), 7.17 – 7.06 (m, 2H), 6.98 – 6.89 (m, 1H), 6.00 (d, *J* = 7.5 Hz, 1H), 5.85 (d, *J* = 54.1 Hz, 2H), 5.48 (br, 1H), 1.57 (d, *J* = 6.7 Hz, 3H).

*(R)-N-(1-(5-fluoro-2-(2-fluoroethoxy)phenyl)ethyl)-3-iodopyrazolo[1,5-a]pyrimidin-5-amine* (**19b**)

The compounds **19b** were prepared from **18** and 1-fluoro-2-iodoethane by following a similar procedure as described for **19a**. 1H NMR (600 MHz, CDCl3) δ 8.12 (d, *J* = 7.5 Hz, 1H), 7.81 (s, 1H), 7.18 – 7.09 (m, 1H), 6.98 – 6.88 (m, 1H), 6.85 – 6.80 (m, 1H), 6.08 – 5.90 (m, 2H), 5.54 – 5.26 (m, 1H), 4.96 – 4.73 (m, 2H), 4.41 – 4.19 (m, 2H), 1.60 (d, *J* = 6.8 Hz, 3H).

*(R)-N-(1-(5-fluoro-2-(3-fluoropropoxy)phenyl)ethyl)-3-iodopyrazolo[1,5-a]pyrimidin-5-amine* (**19c**)

The compounds **19c** were prepared from **18** and 1-fluoro-3-iodopropane by following a similar procedure as described for **19a**. 1H NMR (600 MHz, CDCl3) δ 8.13 (d, *J* = 7.5 Hz, 1H), 7.81 (s, 1H), 7.14 – 7.05 (m, 1H), 6.94 – 6.88 (m, 1H), 6.87 – 6.80 (m, 1H), 5.96 (d, *J* = 7.6 Hz, 1H), 5.90 – 5.79 (m, 1H), 5.54 – 5.23 (m, 1H), 4.83 – 4.62 (m, 2H), 4.25 – 4.13 (m, 2H), 2.36 – 2.16 (m, 2H), 1.57 (d, *J* = 6.8 Hz, 3H).

*(R)-N-(1-(2-(2,2-difluoroethoxy)-5-fluorophenyl)ethyl)-3-iodopyrazolo[1,5-a]pyrimidin-5-amine* (**19d**)

The compounds **19d** were prepared from **18** and 1,1-difluoro-2-iodoethane by following a similar procedure as described for **19a**. 1H NMR (600 MHz, CDCl3) δ 8.14 (d, *J* = 7.6 Hz, 1H), 7.81 (s, 1H), 7.17 – 7.08 (m, 1H), 6.96 – 6.87 (m, 1H), 6.85 – 6.76 (m, 1H), 6.20 (tt, *J* = 54.8, 3.8 Hz, 1H), 5.98 (d, *J* = 7.6 Hz, 1H), 5.79 – 5.59 (m, 1H), 5.50 – 5.29 (m, 1H), 4.40 – 4.15 (m, 2H), 1.58 (d, *J* = 6.8 Hz, 3H).

*(R)-N-(1-(5-fluoro-2-(2,2,2-trifluoroethoxy)phenyl)ethyl)-3-iodopyrazolo[1,5-a]pyrimidin-5-amine* (**19e**)

The compounds **19d** were prepared from **18** and 1,1,1-trifluoro-2-iodoethane by following a similar procedure as described for **19a**. 1H NMR (600 MHz, CDCl3) δ 8.13 (d, *J* = 7.6 Hz, 1H), 7.82 (s, 1H), 7.16 – 7.07 (m, 1H), 6.92 – 6.84 (m, 1H), 6.81 – 6.72 (m, 1H), 5.95 (d, *J* = 7.6 Hz, 1H), 5.80 – 5.61 (m, 1H), 5.53 – 5.27 (m, 1H), 5.01 – 4.84 (m, 2H), 1.55 (d, *J* = 6.8 Hz, 3H).

# Preparation of All Target Compounds

*(R)-1-(5-(2-(2,5-difluorophenyl)pyrrolidin-1-yl)pyrazolo[1,5-a]pyrimidin-3-yl)imidazolidin-2-one* (**5a**). A mixture of **10** (200 mg, 0.52 mmol), imidazolidin-2-one (1.56 mmol), Cu(I) iodide (0.1 mmol), (1R,2R)-N,N'-Dimethyl-1,2-cyclohexanediamine (0.1 mmol), and K3PO4 (4 mmol) were added to a sealed tube. The tube was degassed and charged with nitrogen (three cycles). DMF (10.0 mL) were added by syringe at room temperature. The mixture was heated to 110 °C for overnight under an atmosphere of nitrogen. The reaction was allowed to cool and then diluted with ethyl acetate (200 mL), wash with saturated brine (2×50mL), dried over Na2SO4, filtered, and concentrated. The residue was purified by chromatography (DCM/MeOH = 200:1 to 50:1) to yield **5a** (151 mg, 81%) as a yellow solid. m.p. 115.5−116.9 °C. 1H NMR (600 MHz, DMSO-*d*6) δ 8.61 – 8.35 (m, 1H), 7.96 (s, 1H), 7.34 – 7.16 (m, 1H), 7.15 – 7.03 (m, 1H), 7.02 – 6.89 (m, 1H), 6.65 – 6.53 (m, 1H), 6.51 – 6.34 (m, 1H), 5.39 – 5.23 (m, 1H), 4.01 – 3.87 (m, 2H), 3.72 – 3.49 (m, 2H), 3.31 – 3.11 (m, 2H), 2.47 – 2.34 (m, 1H), 2.10 – 1.95 (m, 2H), 1.91 – 1.76 (m, 1H). 13C NMR (150 MHz, DMSO-*d*6) δ 160.02 (d, *JC-F* = 164.0 Hz), 159.47, 157.89, 155.90 (d, *JC-F* = 239.9 Hz), 152.18, 138.31, 136.16 (d, *JC-F* = 12.4 Hz), 133.80, 116.87, 114.85, 114.08 (d, *JC-F* = 25.2 Hz), 107.33 (d, *JC-F* = 36.9 Hz), 98.42, 56.00, 48.16, 45.18, 38.17, 33.47, 23.92. HR-MS (EI) m/z calcd for C19H18F2N6O, 384.3908; found 385.3901 [M+H]+. HPLC purity: 99.24%, tR = 11.16 min.

*(R)-5-(2-(2,5-difluorophenyl)pyrrolidin-1-yl)-3-(furan-3-yl)pyrazolo[1,5-a]pyrimidine* (**5b**). A mixture of **10** (200 mg, 0.52 mmol), 2-(furan-3-yl)-4,4,5,5-tetramethyl-1,3,2-dioxaborolane (0.68 mmol), tetrakis(triphenylphosphine)palladium (Pd(PPh3)4, 0.0026 mmol) and K2CO3 (1.56 mmol) were added to a sealed tube. The tube was degassed and charged with nitrogen (three cycles). DMF (10 mL) and water (2 mL) were added by syringe at room temperature. The mixture was heated to 110 °C for overnight under an atmosphere of nitrogen. The reaction was allowed to cool and then diluted with ethyl acetate (200 mL), wash with saturated brine (2×50mL), dried over Na2SO4, filtered, and concentrated. The residue was purified by chromatography (heptane/acetone = 4:1) to yield **5b** (120 mg, 65%) as a white solid. m.p. 142.3−143.7 °C. 1H NMR (600 MHz, DMSO-*d*6) δ 8.75 – 8.62 (m, 1H), 7.93 (s, 1H), 7.88 – 7.79 (m, 1H), 7.61 – 7.48 (m, 1H), 7.36 – 7.23 (m, 1H), 7.14 – 7.05 (m, 1H), 7.04 – 6.88 (m, 1H), 6.70 – 6.61 (m, 1H), 6.60 – 6.48 (m, 1H), 5.55 – 5.40 (m, 1H), 4.08 – 3.96 (m, 1H), 3.70 – 3.55 (m, 1H), 2.49 – 2.37 (m, 1H), 2.13 – 1.97 (m, 2H), 1.92 – 1.81 (m, 1H). 13C NMR (100 MHz, DMSO-*d*6) δ 158.26 (d, *JC-F* = 240.1 Hz), 155.52 (d, *JC-F* = 238.7 Hz), 153.07, 150.10, 142.65 (d, *JC-F* = 9.6 Hz), 141.68, 136.57, 135.81, 117.24, 113.65, 108.38, 97.98, 97.35, 55.65, 47.79, 33.15, 23.07. HR-MS (EI) m/z calcd for C20H16F2N4O, 366.3718; found 367.3712 [M+H]+. HPLC purity: 98.09%, tR = 11.40 min.

The compounds **5c-m** were prepared from the key intermediate **10** and corresponding boronic acid pinacol ester by following a similar procedure as described for **5b**.

*(R)-4-(5-(2-(2,5-difluorophenyl)pyrrolidin-1-yl)pyrazolo[1,5-a]pyrimidin-3-yl)isoxazole* (**5c**). Yield: 54%, yellow solid. m.p. 137.3−139.1 °C. 1H NMR (600 MHz, DMSO-*d*6) δ 8.15 – 7.89 (m, 2H), 7.83 (s, 1H), 7.75 (s, 1H), 7.38 – 7.25 (m, 1H), 7.19 – 7.06 (m, 1H), 7.04 – 6.93 (m, 1H), 6.82 – 6.64 (m, 1H), 5.41 – 5.26 (m, 1H), 4.10 – 3.94 (m, 1H), 3.68 – 3.52 (m, 1H), 2.46 – 2.39 (m, 1H), 2.13 – 1.93 (m, 2H), 1.93 – 1.82 (m, 1H). 13C NMR (100 MHz, DMSO-*d*6) δ 158.25 (d, *JC-F* = 239.2 Hz), 155.55 (d, *JC-F* = 238.2 Hz), 153.29, 144.05, 140.95, 135.86, 116.86, 114.65, 113.73, 113.49, 100.62, 98.17, 55.69, 47.80, 33.18, 23.04. HR-MS (EI) m/z calcd for C19H15F2N5O, 367.1245; found 368.1629 [M+ H]+.

*(R)-5-(2-(2,5-difluorophenyl)pyrrolidin-1-yl)-3-(1H-pyrazol-4-yl)pyrazolo[1,5-a]pyrimidine* (**5d**). Yield: 67%, yellow solid. m.p. 193.3−194.8 °C. 1H NMR (600 MHz, DMSO-*d*6) δ 12.68 (br, 1H), 8.69 – 8.58 (m, 1H), 8.11 (s, 1H), 7.64 (s, 2H), 7.34 – 7.25 (m, 1H), 7.16 – 6.94 (m, 2H), 6.58 – 6.47 (m, 1H), 5.55 – 5.44 (m, 1H), 4.07 – 3.97 (m, 1H), 3.69 – 3.57 (m, 1H), 2.47 – 2.41 (m, 1H), 2.10 – 1.81 (m, 3H). 13C NMR (100 MHz, DMSO-*d*6) δ 159.39 (d, *JC-F* = 237.0 Hz), 156.66 (d, *JC-F* = 237.0 Hz), 152.76, 143.11, 141.21, 137.05, 135.68, 134.66, 134.54, 116.60, 114.74, 113.66 (d, *JC-F* = 25.0 Hz), 112.42, 98.12, 97.77, 55.49, 47.75, 33.12, 22.51. HR-MS (EI) m/z calcd for C19H16F2N6, 366.1405; found 367.1471 [M+ H]+. HPLC purity: 97.81%, tR = 6.07 min.

*(R)-5-(2-(2,5-difluorophenyl)pyrrolidin-1-yl)-3-phenylpyrazolo[1,5-a]pyrimidine* (**5e**). Yield: 65%, white solid. m.p. 137.1−138.6 °C. 1H NMR (600 MHz, DMSO-*d*6) δ 8.70 (d, *J* = 7.2 Hz, 1 H), 8.34 (m, 1H), 8.05 – 8.00 (m, 1H), 7.78 (d, *J* = 7.2 Hz, 1H), 7.73 – 7.60 (m, 2H), 7.24 – 7.14 (m, 2H), 7.11 – 6.96 (m, 2H), 6.57 d, *J* = 7.2 Hz, 1H), 5.50 – 5.38 (m, 1H), 4.07 – 3.94 (m, 1H), 3.71 – 3.58 (m, 1H), 2.47 – 2.40 (m, 1H), 2.16 – 2.00 (m, 2H), 1.92 – 1.81 (m, 1H). 13C NMR (100 MHz, DMSO-*d*6) δ 159.92 (d, *JC-F* = 236.0 Hz), 157.28 (d, *JC-F* = 236.0 Hz), 153.54, 144.46, 142.41, 136.50, 133.55(d, *JC-F* = 3.0, 3.0 Hz), 129.80, 128.59, 127.78, 117.03, 115.68, 115.42, 113.93, 104.37, 98.53, 56.29, 48.31, 33.56, 23.72. HR-MS (EI) m/z calcd for C22H18F2N4, 376.1502; found 377.1586 [M+H]+.

*(R)-5-(2-(2,5-difluorophenyl)pyrrolidin-1-yl)-3-(6-methylpyridin-3-yl)pyrazolo[1,5-a]pyrimidine* (**5f**). Yield: 58%, yellow solid. m.p. 153.5−154.6 °C. 1H NMR (600 MHz, DMSO-*d*6) δ 8.76 (d, *J* = 7.8 Hz, 1H), 8.49 (s, 1H), 8.19 (d, *J* = 5.2 Hz, 1H), 7.59 (s, 1H), 7.45 (d, *J* = 5.2 Hz, 1H), 7.39 – 7.32 (m, 1H), 7.12 – 7.05 (m, 1H), 7.04 – 6.96 (m, 1H), 6.64 (d, *J* = 7.8 Hz, 1H), 5.59 – 5.47 (m, 1H), 4.08 – 3.99 (m, 1H), 3.70 – 3.60 (m, 1H), 2.49 – 2.42 (m, 1H), 2.38 (s, 3H), 2.12 – 2.03 (m, 2H), 1.92 – 1.83 (m, 1H). 13C NMR (100 MHz, DMSO-*d*6) δ 158.22 (d, *JC-F* = 239.8 Hz), 157.45, 155.59 (d, *JC-F* = 239.4 Hz), 153.64, 148.44, 145.14, 142.60, 140.53, 136.20, 132.83, 117.29, 116.90, 115.75, 114.64, 113.53 (d, *JC-F* = 24.4 Hz), 101.55, 98.51, 55.87, 47.85, 32.92, 24.02, 23.12. HR-MS (EI) m/z calcd for C22H19F2N5, 391.1609; found 392.1679 [M+ H]+.

*(R)-5-(2-(2,5-difluorophenyl)pyrrolidin-1-yl)-3-(1-methyl-1H-pyrazol-4-yl)pyrazolo[1,5-a]pyrimidine* (**5g**). Yield: 61%, yellow solid. m.p. 148.7−150.2 °C. 1H NMR (600 MHz, DMSO-*d*6) δ 8.71 – 8.56 (m, 1H), 8.08 (s, 1H), 7.55 (s, 2H), 7.35 (s, 1H), 7.18 – 6.92 (m, 3H), 6.57 – 6.47 (m, 1H), 5.53 – 5.42 (m, 1H), 4.08 – 3.92 (m, 1H), 3.80 (s, 3H), 3.68 – 3.56 (m, 1H), 2.47 – 2.41 (m, 1H), 2.13 – 1.80 (m, 3H). 13C NMR (100 MHz, DMSO-*d*6) δ 159.43 (d, *JC-F* = 237.0 Hz), 156.68 (d, *JC-F* = 238.0 Hz), 152.74, 143.11, 140.97, 135.71, 134.98, 133.42, 125.49, 116.68, 114.62, 113.79 (d, *JC-F* = 5.0 Hz), 113.49, 55.62, 47.75, 38.32, 33.09, 23.22. HR-MS (EI) m/z calcd for C20H18F2N6, 380.1561; found 381.1633 [M+ H]+. HPLC purity: 99.17%, tR = 13.16 min.

*(R)-5-(2-(2,5-difluorophenyl)pyrrolidin-1-yl)-3-(5-methyl-1H-pyrazol-4-yl)pyrazolo[1,5-a]pyrimidine* (**5h**). Yield: 53%, yellow solid. m.p. 163.7−165.1 °C. 1H NMR (400 MHz, DMSO-*d*6) δ 12.38 (br, 1H), 8.76 – 8.62 (m, 1H), 8.06 – 7.95 (m, 1H), 7.37 – 7.25 (m, 1H), 7.20 – 7.03 (m, 1H), 7.02 – 6.89 (m, 1H), 6.66 – 6.44 (m, 1H), 5.55 – 5.39 (m, 1H), 4.07 – 3.96 (m, 1H), 3.71 – 3.57 (m, 1H), 2.48 – 2.39 (m, 1H), 2.23 (s, 3H), 2.10 – 2.00 (m, 2H), 1.93 – 1.83 (m, 1H). 13C NMR (100 MHz, DMSO-*d*6) δ 158.22 (d, *JC-F* = 240.5 Hz), 155.51 (d, *JC-F* = 239.9 Hz), 152.72, 143.43, 141.43, 135.72, 116.95, 114.70, 113.56 (d, *JC-F* = 25.0 Hz), 109.80, 98.63, 97.83, 55.50, 47.73, 33.08, 22.84, 18.82. HR-MS (EI) m/z calcd for C20H18F2N6, 380.1561; found 381.1642 [M+ H]+. HPLC purity: 98.79%, tR = 16.30 min.

*(R)-5-(2-(2,5-difluorophenyl)pyrrolidin-1-yl)-3-(1,5-dimethyl-1H-pyrazol-4-yl)pyrazolo[1,5-a]pyrimidine* (**5i**). Yield: 51%, white solid. m.p. 151.3−152.7 °C. 1H NMR (400 MHz, DMSO-*d*6) δ 8.78 – 8.59 (m, 1H), 8.01 (s, 1H), 7.44 – 7.25 (m, 2H), 7.20 – 7.09 (m, 1H), 7.02 – 6.96 (m, 1H), 6.66 – 6.48 (m, 1H), 5.53 – 5.37 (m, 1H), 4.08 – 3.96 (m, 1H), 3.74 (s, 3H), 3.66 – 3.58 (m, 1H), 2.47 – 2.37 (m, 1H), 2.22 (s, 3H), 2.12 – 1.84 (m, 3H). 13C NMR (100 MHz, DMSO-*d*6) δ 159.36 (d, *JC-F* = 238.0 Hz), 156.67 (d, *JC-F* = 236.0 Hz), 152.70, 143.53, 141.57, 135.73, 133.45, 117.05, 114.57, 113.70 (d, *JC-F* = 17.0 Hz), 110.71, 98.48, 97.86, 55.53, 47.70, 36.00, 33.20, 22.81, 10.16. HR-MS (EI) m/z calcd for C21H20F2N6, 394.1718; found 394.1721 [M]+. HPLC purity: 99.65%, tR = 17.47 min.

*(R)-5-(2-(2,5-difluorophenyl)pyrrolidin-1-yl)-3-(1,3-dimethyl-1H-pyrazol-4-yl)pyrazolo[1,5-a]pyrimidine* (**5j**). Yield: 58%, white solid. m.p. 172.5−173.9 °C. 1H NMR (600 MHz, DMSO-*d*6) δ 8.72 – 8.62 (m, 1H), 7.99 (s, 1H), 7.42 – 7.29 (m, 2H), 7.15 – 7.06 (m, 1H), 7.04 – 6.95 (m, 1H), 6.59 – 6.49 (m, 1H), 5.49 – 5.38 (m, 1H), 4.05 – 3.96 (m, 1H), 3.70 (s, 3H), 3.65 – 3.56 (m, 1H), 2.46 – 2.39 (m, 1H), 2.18 (s, 3H), 2.10 – 1.79 (m, 3H). 13C NMR (100 MHz, DMSO-*d*6) δ 159.43 (d, *JC-F* = 239.0 Hz), 156.67 (d, *JC-F* = 237.0 Hz), 152.67, 143.29, 140.81, 135.69, 133.20, 127.42, 116.76, 114.79, 113.82 (dd, *JC-F* = 5.0, 4.0 Hz), 110.96, 98.24, 97.93, 55.62, 47.74, 37.99, 33.08, 23.10, 13.39. HR-MS (EI) m/z calcd for C21H20F2N6, 394.1718; found 394.1736 [M]+.

*(R)-2-(4-(5-(2-(2,5-difluorophenyl)pyrrolidin-1-yl)pyrazolo[1,5-a]pyrimidin-3-yl)-1H-pyrazol-1-yl)ethan-1-ol* (**5k**). Yield: 75%, white solid. m.p. 168.4−170.1 °C. 1H NMR (600 MHz, DMSO-*d*6) δ 8.70 – 8.57 (m, 1H), 8.07 (s, 1H), 7.60 (s, 1H), 7.54 (s, 1H), 7.38 – 7.25 (m, 1H), 7.15 – 6.89 (m, 2H), 6.57 – 6.43 (m, 1H), 5.55 – 5.39 (m, 1H), 4.97 – 4.81 (m, 1H), 4.20 – 3.91 (m, 3H), 3.79 – 3.54 (m, 3H), 2.44 – 2.35 (m, 1H), 2.11 – 1.75 (m, 3H). 13C NMR (100 MHz, DMSO-*d*6) δ 159.43 (d, *JC-F* = 237.0 Hz), 156.64 (d, *JC-F* = 236.0 Hz), 152.75, 143.08, 141.00, 135.72, 135.07, 133.71, 125.19, 116.98, 114.53, 113.69 (d, *JC-F* = 26.0 Hz), 113.10, 97.91, 97.77, 60.21, 55.54, 53.97, 47.74, 33.07, 23.23. HR-MS (EI) m/z calcd for C21H20F2N6O, 410.1667; found 410.1647 [M]+. HPLC purity: 94.08%, tR = 10.34 min.

*(R)-5-(2-(2,5-difluorophenyl)pyrrolidin-1-yl)-3-(1-(2-methoxyethyl)-1H-pyrazol-4-yl)pyrazolo[1,5-a]pyrimidine* (**5l**). Yield: 71%, yellow solid. m.p. 157.4−158.7 °C. 1H NMR (600 MHz, DMSO-*d*6) δ 8.69 – 8.54 (m, 1H), 8.06 (s, 1H), 7.65 – 7.48 (m, 2H), 7.34 – 7.22 (m, 1H), 7.12 – 7.02 (m, 1H), 7.00 – 6.89 (m, 1H), 6.56 – 6.42 (m, 1H), 5.55 – 5.38 (m, 1H), 4.23 – 4.08 (m, 2H), 4.05 – 3.90 (m, 1H), 3.74 – 3.49 (m, 3H), 3.20 (s, 3H), 2.43 – 2.36 (m, 1H), 2.08 – 1.95 (m, 2H), 1.88 – 1.77 (m, 1H). 13C NMR (100 MHz, DMSO-*d*6) δ 158.28 (d, *JC-F* = 239.9 Hz), 155.52 (d, *JC-F* = 240.0 Hz), 152.89, 143.25, 141.13, 135.71, 135.33, 134.53 (d, *JC-F* = 11.7 Hz), 125.35, 116.79, 114.69, 113.60 (d, *JC-F* = 25.1 Hz), 113.28, 97.78, 70.66, 57.96, 55.66, 51.12, 47.79, 33.23, 22.92. HR-MS (EI) m/z calcd for C22H22F2N6O, 424.4558; found 424.4641 [M+H]+. HPLC purity: 98.73%, tR = 12.27 min.

*(R)-3-(1-cyclopropyl-1H-pyrazol-4-yl)-5-(2-(2,5-difluorophenyl)pyrrolidin-1-yl)pyrazolo[1,5-a]pyrimidine* (**5m**). Yield: 69%, yellow solid. m.p. 180.9−182.3 °C. 1H NMR (600 MHz, DMSO-*d*6) δ 8.67 – 8.58 (m, 1H), 8.07 (s, 1H), 7.59 (s, 1H), 7.53 (s, 1H), 7.35 – 7.29 (m, 1H), 7.14 – 7.05 (m, 1H), 7.00 – 6.91 (m, 1H), 6.55 – 6.45 (m, 1H), 5.55 – 5.47 (m, 1H), 4.75 – 4.65 (m, 1H), 4.05 – 3.95 (m, 1H), 3.63 – 3.54 (m, 2H), 2.45 – 2.30 (m, 3H), 2.08 – 1.74 (m, 4H). 13C NMR (100 MHz, DMSO-*d*6) δ 159.41 (d, *JC-F* = 237.0 Hz), 156.64 (d, *JC-F* = 238.0 Hz), 152.79, 143.10, 141.07, 135.73, 135.04, 133.24, 124.65, 116.99, 114.70, 113.68 (d, *JC-F* = 25.0 Hz), 113.28, 97.81, 97.70, 55.55, 47.73, 33.05, 32.25, 23.09, 6.19. HR-MS (EI) m/z calcd for C22H20F2N6, 406.1718; found 406.1700 [M]+. HPLC purity: 99.49%, tR = 18.05 min.

The compounds **6a-e** were prepared from the key intermediate **14** and corresponding boronic acid pinacol ester by following a similar procedure as described for **5b**.

*(R)-3-(1-cyclopropyl-1H-pyrazol-4-yl)-N-(1-(2,5-difluorophenyl)ethyl)pyrazolo[1,5-a]pyrimidin-5-amine* (**6a**). Yield: 55%, yellow solid. m.p. 212.2−113.8 °C. 1H NMR (600 MHz, DMSO-d6) δ 8.48 (d, *J* = 7.2 Hz, 1H), 8.11 (d, *J* = 6.6 Hz, 1H), 8.04 (s , 1H), 7.86 (s, 1H), 7.70 (s, 1H), 7.36 – 7.15 (m, 2H), 7.14 – 7.06 (m, 1H), 6.34 (d, *J* = 7.2 Hz, 1H), 5.52 – 5.31 (m, 1H), 3.66 (p, *J* = 6.0 Hz, 1H), 1.51 (d, *J* = 7.2 Hz, 3H), 1.09 – 0.94 (m, 4H). 13C NMR (101 MHz, DMSO) δ 159.58 (d, *JC-F* = 237.0 Hz), 156.92 (d, *JC-F* = 236.0 Hz), 153.98, 143.16, 140.68, 135.36, 135.15, 134.74 (dd, *JC-F* = 8.0, 6.0 Hz), 124.79, 116.95 (dd, *JC-F* = 9.0, 10.0 Hz), 114.84 (dd, *JC-F* = 8.0, 9.0 Hz), 113.24, 113.00 (dd, *JC-F* = 3.0, 3.0 Hz), 99.68, 98.14, 44.03, 32.30, 21.63, 6.16, 6.10. HR-MS (EI) m/z calcd for C20H18F2N6, 380.4028; found 380.4133 [M+ H]+. HPLC purity: 98.23%, tR = 14.31 min.

*(R)-N-(1-(2,5-difluorophenyl)ethyl)-3-(1H-pyrazol-4-yl)pyrazolo[1,5-a]pyrimidin-5-amine* (**6b**). Yield: 58%, yellow solid. m.p. 235.1−236.6 °C. 1H NMR (600 MHz, DMSO-*d*6) δ 12.86 (s, 1 H), 8.61 (d, *J* = 7.6 Hz, 1H), 8.25 – 8.17 (m, 2H), 7.98 (br, 2H), 7.44 – 7.30 (m, 2H), 7.27 – 7.18 (m, 1H), 6.47 (d, *J* = 7.6 Hz, 1H), 5.61 – 5.51 (m, 1H), 1.64 (d, *J* = 6.6 Hz, 3H). 13C NMR (100 MHz, DMSO-*d*6) δ 159.56 (d, *JC-F* = 238.0 Hz), 156.93 (d, *JC-F* = 238.0 Hz), 153.93, 143.14, 140.83, 135.34, 134.57 (dd, *JC-F* = 6.0, 6.0 Hz), 123.07, 116.82 (dd, *JC-F* = 9.0, 8.0 Hz), 114.85 (dd, *JC-F* = 8.0, 9.0 Hz), 113.39 (dd, *JC-F* = 5.0, 5.0 Hz), 112.42, 99.63, 98.56, 43.86, 21.57. HR-MS (EI) m/z calcd for C17H14F2N6, 340.1248; found 341.1320 [M+ H]+. HPLC purity: 99.18%, tR = 10.02 min.

*(R)-N-(1-(2,5-difluorophenyl)ethyl)-3-(1-methyl-1H-pyrazol-4-yl)pyrazolo[1,5-a]pyrimidin-5-amine* (**6c**). Yield: 61%, yellow solid. m.p. 230.7−232.3 °C. 1H NMR (600 MHz, DMSO-*d*6) δ 8.47 (d, *J* = 7.2 Hz, 1H), 8.11 (d, *J* = 6.6 Hz, 1H), 8.03 (s, 1H), 7.80 (s, 1H), 7.70 (s, 1H), 7.37 – 7.27 (m, 1H), 7.24 – 7.19 (m, 1H), 7.11 – 7.06 (m, 1H), 6.34 (d, *J* = 7.2 Hz, 1H), 5.45 – 5.32 (m, 1H), 3.84 (s, 3H), 1.51 (d, *J* = 7.2 Hz, 3H). 13C NMR (100 MHz, DMSO-*d*6) δ 159.57 (d, *JC-F* = 237.0 Hz), 157.00 (d, *JC-F* = 237.0 Hz), 153.95, 143.15, 140.58, 135.33, 135.07, 134.66 (dd, *JC-F* = 6.0, 7.0 Hz), 125.68, 116.91 (dd, *JC-F* = 9.0, 9.0 Hz), 114.83 (dd, *JC-F* = 9.0, 9.0 Hz), 113.47, 113.19 (dd, *JC-F* = 5.0, 5.0 Hz), 99.65, 98.24, 44.20, 38.34, 21.57. HR-MS (EI) m/z calcd for C18H16F2N6, 354.1405; found 355.1475 [M+ H]+.

*(R)-2-(4-(5-((1-(2,5-difluorophenyl)ethyl)amino)pyrazolo[1,5-a]pyrimidin-3-yl)-1H-pyrazol-1-yl)ethan-1-ol* (**6d**). Yield: 63%, yellow solid. m.p. 228.1−229.5 °C. 1H NMR (600 MHz, DMSO-*d*6) δ 8.47 (d, *J* = 7.2 Hz, 1H), 8.10 (d, *J* = 6.6 Hz, 1H), 8.04 (s, 1H), 7.86 (s, 1H), 7.73 (s, 1H), 7.35 – 7.14 (m, 2H), 7.12 – 7.03 (m, 1H), 6.33 (d, *J* = 7.2 Hz, 1H), 5.52 – 5.32 (m, 1H), 4.92 (t, *J* = 6.0 Hz, 1H), 4.12 (t, *J* = 6.0 Hz, 2H), 3.75 (dt, *J* = 6.0 Hz, 2H), 1.50 (d, *J* = 7.2 Hz, 3H). 13C NMR (100 MHz, DMSO-*d*6) δ 159.57 (d, *JC-F* = 238.0 Hz), 156.97 (d, *JC-F* = 238.0 Hz), 153.93, 143.13, 140.65, 135.35, 135.18, 134.69 (dd, *JC-F* = 7.0, 7.0 Hz), 125.48, 116.95 (dd, *JC-F* = 8.0, 8.0 Hz), 114.85 (dd, *JC-F* = 9.0, 9.0 Hz), 113.40 (dd, *JC-F* = 4.0, 5.0 Hz), 113.06, 99.64, 98.35, 60.20, 54.02, 44.06, 21.59. HR-MS (EI) m/z calcd for C19H18F2N6O, 384.1511; found 385.1583 [M+ H]+. HPLC purity: 99.57%, tR = 9.67 min.

*(R)-N-(1-(2,5-difluorophenyl)ethyl)-3-(1-(2-methoxyethyl)-1H-pyrazol-4-yl)pyrazolo[1,5-a]pyrimidin-5-amine* (**6e**). Yield: 75%, yellow solid. m.p. 218.1−219.7 °C. 1H NMR (600 MHz, DMSO-*d*6) δ 8.61 (d, *J* = 7.6 Hz, 1H), 8.24 (d, *J* = 6.6 Hz, 1H), 8.19 (s, 1H), 8.00 (s, 1H), 7.89 (s, 1H), 7.45 – 7.32 (m, 2H), 7.26 – 7.18 (m, 1H), 6.48 (d, *J* = 7.6 Hz, 1H), 5.63 – 5.44 (m, 1H), 4.38 (t, *J* = 5.4 Hz, 2H), 3.84 (t, *J* = 5.4 Hz, 2H), 3.51 (s, 3H), 1.64 (d, *J* = 6.6 Hz, 3H). 13C NMR (100 MHz, DMSO-*d*6) δ 159.55 (d, *JC-F* = 237.0 Hz), 156.95 (d, *JC-F* = 237.0 Hz), 153.96, 143.14, 140.65, 135.36, 135.29, 134.64 (dd, *JC-F* = 7.0, 7.0 Hz), 125.44, 116.95 (dd, *JC-F* = 8.0, 8.0 Hz), 114.86 (dd, *JC-F* = 8.0, 9.0 Hz), 113.44 (dd, *JC-F* = 5.0, 5.0 Hz), 113.22, 99.65, 98.24, 70.63, 57.94, 51.12, 44.05, 21.57. HR-MS (EI) m/z calcd for C20H20F2N6O, 398.1667; found 399.1741 [M+ H]+. HPLC purity: 99.57%, tR = 13.51 min.

The compounds **7a-h** were prepared from the key intermediate **19a-e** and corresponding boronic acid pinacol ester by following a similar procedure as described for **5b**.

*(R)-N-(1-(5-fluoro-2-(fluoromethoxy)phenyl)ethyl)-3-(1H-pyrazol-4-yl)pyrazolo[1,5-a]pyrimidin-5-amine* (**7a**). Yield: 56%, yellow solid. m.p. 130.8−132.6 °C. 1H NMR (400 MHz, DMSO-*d*6) δ 12.68 (s, 1H), 8.46 (d, *J* = 7.6 Hz, 1H), 8.10 – 7.99 (m, 2H), 7.86 (br, 1H), 7.79 (br, 1H), 7.25 – 7.20 (dd, *J* = 9.2, 4.4 Hz, 1H), 7.16 (dd, *J* = 9.5, 3.2 Hz, 1H), 7.07 (td, *J* = 8.0, 3.2 Hz, 1H), 6.33 (d, *J* = 7.6 Hz, 1H), 6.00 (d, *JH-F* = 54.2 Hz, 2H), 5.57 – 5.46 (m, 1H), 1.45 (d, *J* = 6.9 Hz, 3H). 13C NMR (150 MHz, DMSO-*d*6) δ 158.64 (d, *JC-F* = 238.9 Hz), 154.40, 149.91, 143.74, 141.18, 137.81, 135.71, 123.81, 116.71 (d, *JC-F* = 8.6 Hz), 114.43 (d, *JC-F* = 23.0 Hz), 112.95 (d, *JC-F* = 24.9 Hz), 112.93, 101.74 (d, *JC-F* = 216.1 Hz), 100.17, 98.87, 44.73, 22.00. HR-MS (EI) m/z calcd for C18H16F2N6O, 370.1354; found 371.1426 [M+ H]+.

*(R)-N-(1-(5-fluoro-2-(2-fluoroethoxy)phenyl)ethyl)-3-(1H-pyrazol-4-yl)pyrazolo[1,5-a]pyrimidin-5-amine* (**7b**). Yield: 68%, yellow solid. m.p. 141.4−143.1 °C. 1H NMR (400 MHz, DMSO-*d*6) δ 12.68 (s, 1H), 8.48 (d, *J* = 7.6 Hz, 1H), 8.07 (s, 1H), 8.02 (d, *J* = 7.0 Hz, 1H), 7.86 (br, 2H), 7.13 – 7.04 (m, 2H), 7.00 (td, *J* = 8.6, 3.0 Hz, 1H), 6.36 (d, *J* = 7.6 Hz, 1H), 5.64 – 5.50 (m, 1H), 4.88 (dt, *JH-F* = 47.6, 3.8 Hz, 2H), 4.42 (dt, *JH-F* = 29.2, 3.8 Hz, 2H), 1.46 (d, *J* = 7.0 Hz, 3H). 13C NMR (150 MHz, DMSO-*d*6) δ 157.22 (d, *JC-F* = 236.3 Hz), 154.96, 151.89, 144.69, 140.76, 136.42, 135.81, 113.83, 113.67, 112.49 (d, *JC-F* = 23.7 Hz), 102.33, 100.64, 82.69 (d, *JC-F* = 167.2 Hz), 68.53 (d, *JC-F* = 19.1 Hz), 44.71, 21.84. HR-MS (EI) m/z calcd for C19H18F2N6O, 384.1511; found 385.1549 [M+ H]+. HPLC purity: 96.34%, tR = 12.28 min.

*(R)-N-(1-(5-fluoro-2-(3-fluoropropoxy)phenyl)ethyl)-3-(1H-pyrazol-4-yl)pyrazolo[1,5-a]pyrimidin-5-amine* (**7c**). Yield: 72%, yellow solid. m.p. 165.5−166.3 °C. 1H NMR (400 MHz, DMSO-*d*6) δ 12.70 (s, 1H), 8.46 (d, *J* = 7.6 Hz, 1H), 8.06 (s, 1H), 7.98 (d, *J* = 7.0 Hz, 1H), 7.86 (br, 2H), 7.09 (dd, *J* = 9.5, 3.1 Hz, 1H), 7.03 (dd, *J* = 9.0, 4.6 Hz, 1H), 6.97 (td, *J* = 8.5, 3.1 Hz, 1H), 6.35 (d, *J* = 7.6 Hz, 1H), 5.62 – 5.48 (m, 1H), 4.68 (dtd, *J* = 47.2, 6.0, 2.3 Hz, 2H), 4.32 – 4.12 (m, 2H), 2.24 (dp, *J* = 24.6, 6.0 Hz, 2H), 1.44 (d, *J* = 7.0 Hz, 3H). 13C NMR (100 MHz, DMSO-*d*6) δ 156.58 (d, *JC-F* = 235.5 Hz), 153.96, 151.65, 143.36, 140.68, 135.78 (d, *JC-F* = 6.0 Hz), 135.17, 113.18 (d, *JC-F* = 22.7 Hz), 112.61, 112.51, 111.93 (d, *JC-F* = 24.1 Hz), 99.70, 98.34, 81.02 (d, *JC-F* = 162.0 Hz), 64.20 (d, *JC-F* = 5.9 Hz), 44.22, 30.00 (d, *JC-F* = 19.4 Hz), 21.30. HR-MS (EI) m/z calcd for C20H20F2N6O, 398.1667; found 399.1718 [M+ H]+. HPLC purity: 99.13%, tR = 11.94 min.

*(R)-N-(1-(2-(2,2-difluoroethoxy)-5-fluorophenyl)ethyl)-3-(1H-pyrazol-4-yl)pyrazolo[1,5-a]pyrimidin-5-amine* (**7d**). Yield: 74%, yellow solid. m.p. 122.6−124.1 °C. 1H NMR (400 MHz, DMSO-*d*6) δ 12.71 (s, 1H), 8.49 (d, *J* = 7.4 Hz, 1H), 8.08 (s, 1H), 8.04 (d, *J* = 6.8 Hz, 1H), 7.85 (br, 2H), 7.17 – 7.08 (m, 2H), 7.02 (td, *J* = 8.5, 3.1 Hz, 1H), 6.52 (tt, *J* = 54.5, 3.2 Hz, 1H), 6.37 (d, *J* = 7.4 Hz, 1H), 5.60 – 5.48 (m, 1H), 4.59 – 4.43 (m, 2H), 1.47 (d, *J* = 6.8 Hz, 3H). 13C NMR (100 MHz, DMSO-*d*6) δ 157.10 (d, *JC-F* = 236.6 Hz), 153.93, 150.80, 143.32, 140.64, 136.25 (d, *JC-F* = 6.2 Hz), 135.19, 115.34 (t, *JC-F* = 239.1 Hz), 113.39 (d, *JC-F* = 9.5 Hz), 113.24 (d, *JC-F* = 5.6 Hz), 112.50, 112.08 (d, *JC-F* = 23.6 Hz), 99.67, 98.40, 67.14 (t, *JC-F* = 26.7 Hz), 44.43, 21.27. HR-MS (EI) m/z calcd for C19H17F3N6O, 402.1416; found 403.1461 [M+ H]+. HPLC purity: 98.97%, tR = 10.63 min.

*(R)-N-(1-(5-fluoro-2-(2,2,2-trifluoroethoxy)phenyl)ethyl)-3-(1H-pyrazol-4-yl)pyrazolo[1,5-a]pyrimidin-5-amine* (**7e**). Yield: 66%, yellow solid. m.p. 121.0−122.3 °C. 1H NMR (400 MHz, DMSO-*d*6) δ 12.67 (s, 1H), 8.46 (d, *J* = 7.6 Hz, 1H), 8.11 – 7.96 (m, 2H), 7.80 (br, 2H), 7.19 – 6.98 (m, 3H), 6.34 (d, *J* = 7.6 Hz, 1H), 5.56 – 5.40 (m, 1H), 5.00 – 4.80 (m, 2H), 1.43 (d, *J* = 6.9 Hz, 3H). 13C NMR (150 MHz, DMSO-*d*6) δ 157.84 (d, *JC-F* = 237.6 Hz), 154.35, 150.50, 143.73, 141.09, 136.77, 135.67, 124.43 (q, *JC-F* = 277.8 Hz), 113.96, 113.84, 112.97, 112.57 (d, *JC-F* = 24.0 Hz), 100.15, 98.87, 65.74 (q, *JC-F* = 34.1 Hz), 44.81, 21.63. HR-MS (EI) m/z calcd for C19H16F4N6O, 420.1322; found 421.1385 [M+ H]+. HPLC purity: 97.67%, tR = 12.58 min.

*(R)-N-(1-(2-(2,2-difluoroethoxy)-5-fluorophenyl)ethyl)-3-(1-methyl-1H-pyrazol-4-yl)pyrazolo[1,5-a]pyrimidin-5-amine* (**7f**). Yield: 69%, yellow solid. m.p. 175.1−176.2 °C. 1H NMR (400 MHz, DMSO-*d*6) δ 8.49 (d, *J* = 7.6 Hz, 1H), 8.14 – 7.96 (m, 2H), 7.75 (br, 2H), 7.23 – 7.09 (m, 2H), 7.08 – 6.99 (m, 1H), 6.71 – 6.29 (m, 2H), 5.66 – 5.41 (m, 1H), 4.49 (t, *J* = 14.3 Hz, 2H), 3.85 (s, 3H), 1.48 (d, *J* = 6.9 Hz, 3H). 13C NMR (100 MHz, DMSO-*d*6) δ 157.13 (d, *JC-F* = 236.6 Hz), 154.03, 150.91, 143.29, 140.58, 136.21 (d, *JC-F* = 6.6 Hz), 135.24, 125.47, 114.20 (t, *JC-F* = 239.1 Hz), 113.76 (d, *JC-F* = 8.2 Hz), 113.59, 113.38 (d, *JC-F* = 22.9 Hz), 112.20 (d, *JC-F* = 23.8 Hz), 99.77, 98.09, 67.40 (t, *JC-F* = 26.5 Hz), 44.65, 38.36, 21.26. HR-MS (EI) m/z calcd for C20H19F3N6O, 416.1572; found 417.1633 [M+ H]+. HPLC purity: 99.54%, tR = 12.95 min.

*(R)-2-(4-(5-((1-(2-(2,2-difluoroethoxy)-5-fluorophenyl)ethyl)amino)pyrazolo[1,5-a]pyrimidin-3-yl)-1H-pyrazol-1-yl)ethan-1-ol* (**7g**). Yield: 75%, yellow solid. m.p. 150.7−152.3 °C. 1H NMR (400 MHz, DMSO-*d*6) δ 8.47 (d, *J* = 7.6 Hz, 1H), 8.04 (s, 1H), 7.98 (d, *J* = 6.9 Hz, 1H), 7.78 (s, 1H), 7.75 (s, 1H), 7.18 – 7.07 (m, 2H), 7.06 – 6.98 (m, 1H), 6.51 (tt, *J* = 54.5, 3.2 Hz, 1H), 6.36 (d, *J* = 7.6 Hz, 1H), 5.56 – 5.43 (m, 1H), 4.94 (t, *J* = 5.2 Hz, 1H), 4.58 – 4.37 (m, 2H), 4.11 (t, *J* = 5.6 Hz, 2H), 3.73 (q, *J* = 5.6 Hz, 2H), 1.45 (d, *J* = 6.9 Hz, 3H). 13C NMR (100 MHz, DMSO-*d*6) δ 157.10 (d, *JC-F* = 236.7 Hz), 154.01, 150.89, 143.31, 140.63, 136.08, 135.44, 135.22, 125.38, 114.21 (t, *JC-F* = 239.1 Hz), 113.67 (d, *JC-F* = 8.6 Hz), 113.39 (d, *JC-F* = 23.0 Hz), 113.15, 112.21 (d, *JC-F* = 23.7 Hz), 99.76, 98.19, 67.33 (t, *JC-F* = 26.8 Hz), 60.25, 53.93, 44.67, 21.21. HR-MS (EI) m/z calcd for C21H21F3N6O2, 446.1678; found 447.1746 [M+ H]+. HPLC purity: 99.83%, tR = 10.29 min.

*(R)-3-(1-cyclopropyl-1H-pyrazol-4-yl)-N-(1-(2-(2,2-difluoroethoxy)-5-fluorophenyl)ethyl)pyrazolo[1,5-a]pyrimidin-5-amine* (**7h**). Yield: 61%, yellow solid. m.p. 154.7−156.5 °C. 1H NMR (400 MHz, DMSO-*d*6) δ 8.48 (d, *J* = 7.6 Hz, 1H), 8.04 (s, 1H), 8.00 (d, *J* = 6.8 Hz, 1H), 7.81 (s, 1H), 7.73 (s, 1H), 7.25 – 7.15 (m, 1H), 7.13 – 7.08 (m, 1H), 7.07 – 6.99 (m, 1H), 6.51 (tt, *J* = 54.5, 3.2 Hz, 1H), 6.38 (d, *J* = 7.6 Hz, 1H), 5.56 – 5.39 (m, 1H), 4.48 (t, *J* = 14.5 Hz, 2H), 3.74 – 3.60 (m, 1H), 1.47 (d, *J* = 6.8 Hz, 3H), 1.11 – 0.92 (m, 4H). 13C NMR (100 MHz, DMSO-*d*6) δ 157.11 (d, *JC-F* = 236.8 Hz), 154.06, 150.88, 143.36, 140.69, 136.10 (d, *JC-F* = 5.6 Hz), 135.34, 135.22, 124.70, 114.17 (t, *JC-F* = 239.1 Hz), 113.77 (d, *JC-F* = 7.7 Hz), 113.38 (d, *JC-F* = 22.5 Hz), 113.37, 112.17 (d, *JC-F* = 22.7 Hz), 99.79, 98.00, 67.38 (t, *JC-F* = 25.8 Hz), 44.72, 32.29, 21.19, 6.19, 6.11. HR-MS (EI) m/z calcd for C22H21F3N6O, 442.1729; found 443.1811 [M+ H]+. HPLC purity: 99.54%, tR = 18.11 min.

# Copies of NMR Data for all Target Compounds


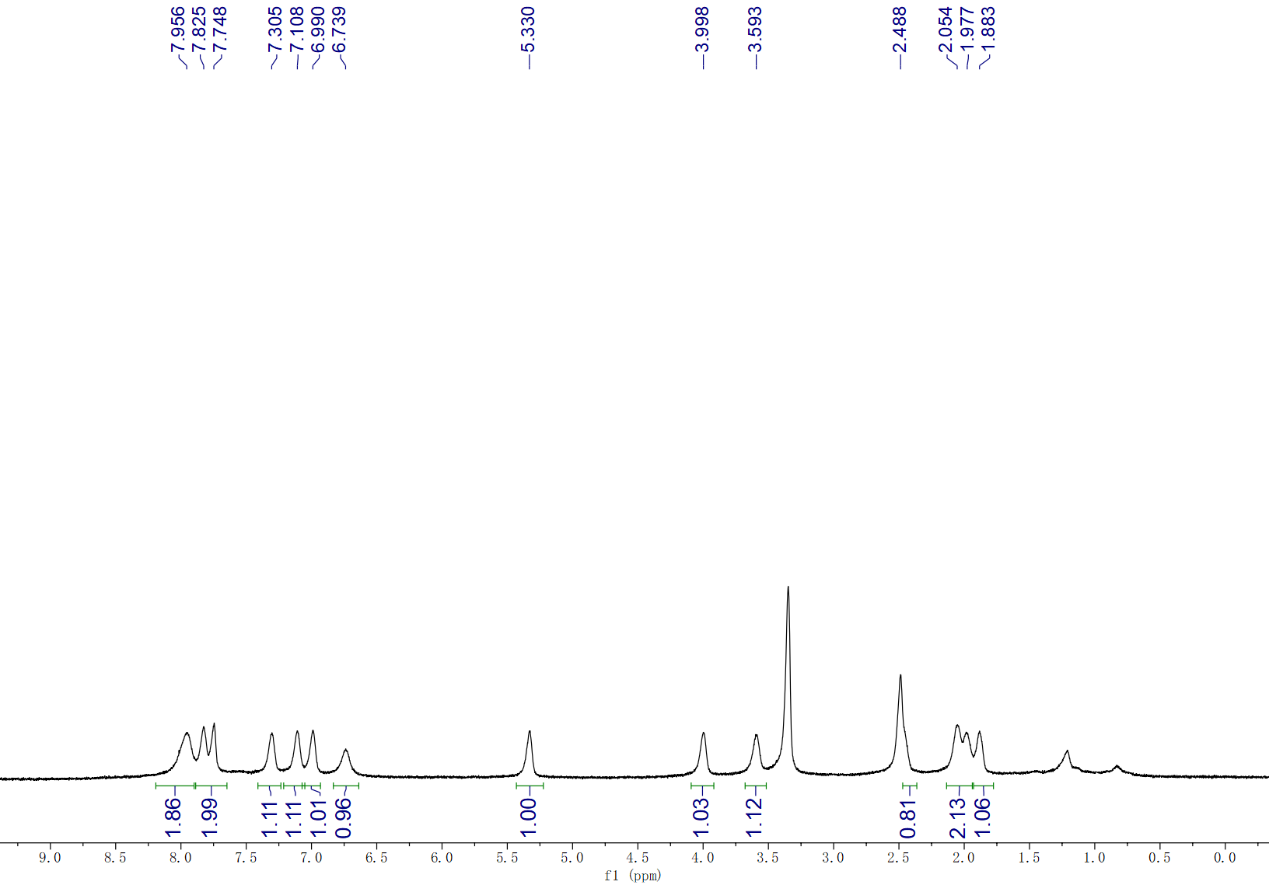


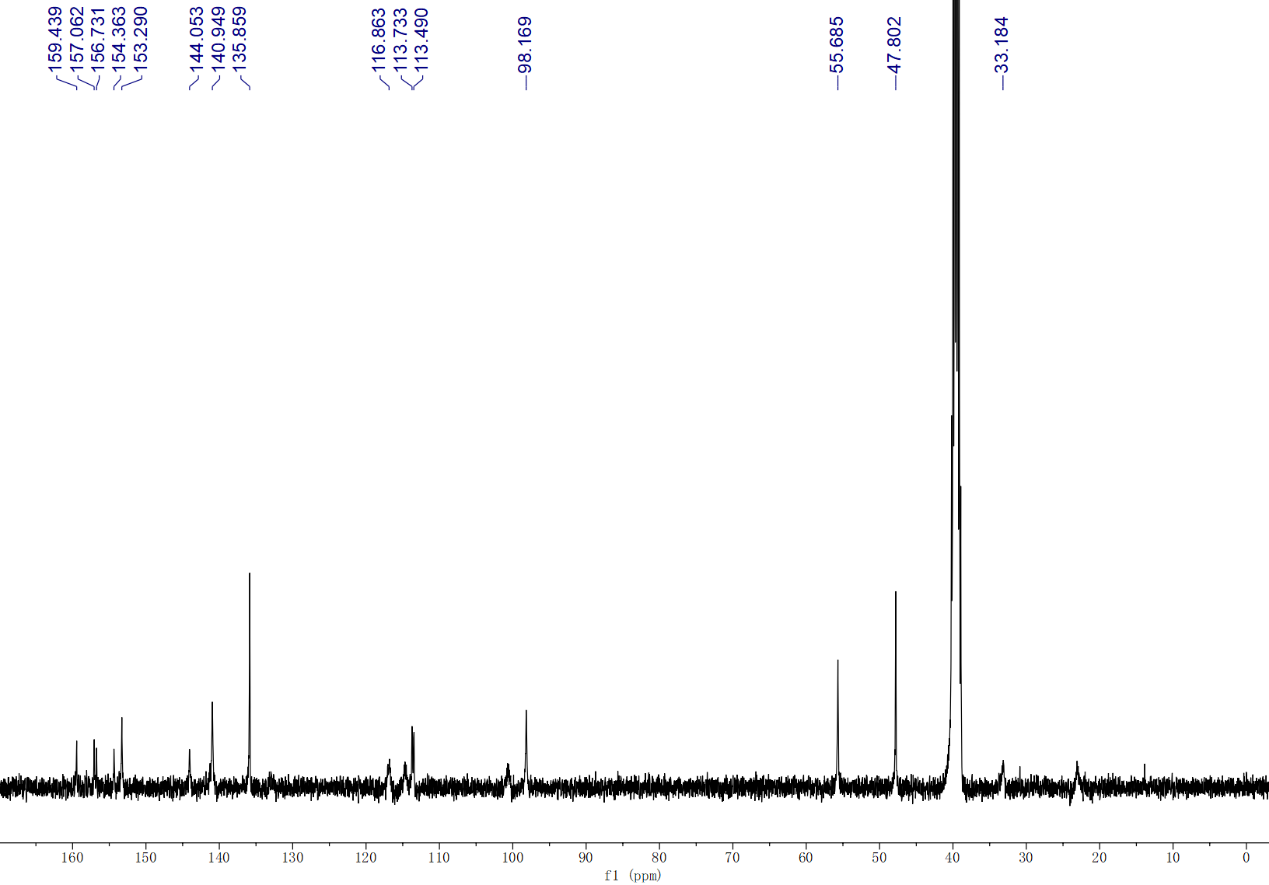


# Copies of HPLC of Representative Compounds

4.1 HPLC trace of compound **5a**:

HPLC Purity: 99.24%; Retention Time: 11.155 min; Instrument: Agilent 1200 with DAD detector; Mobile phase A: H2O (30%); Mobile phase B: MeOH (70%); Column Temp: 30°C; Wavelength: 254 nm.


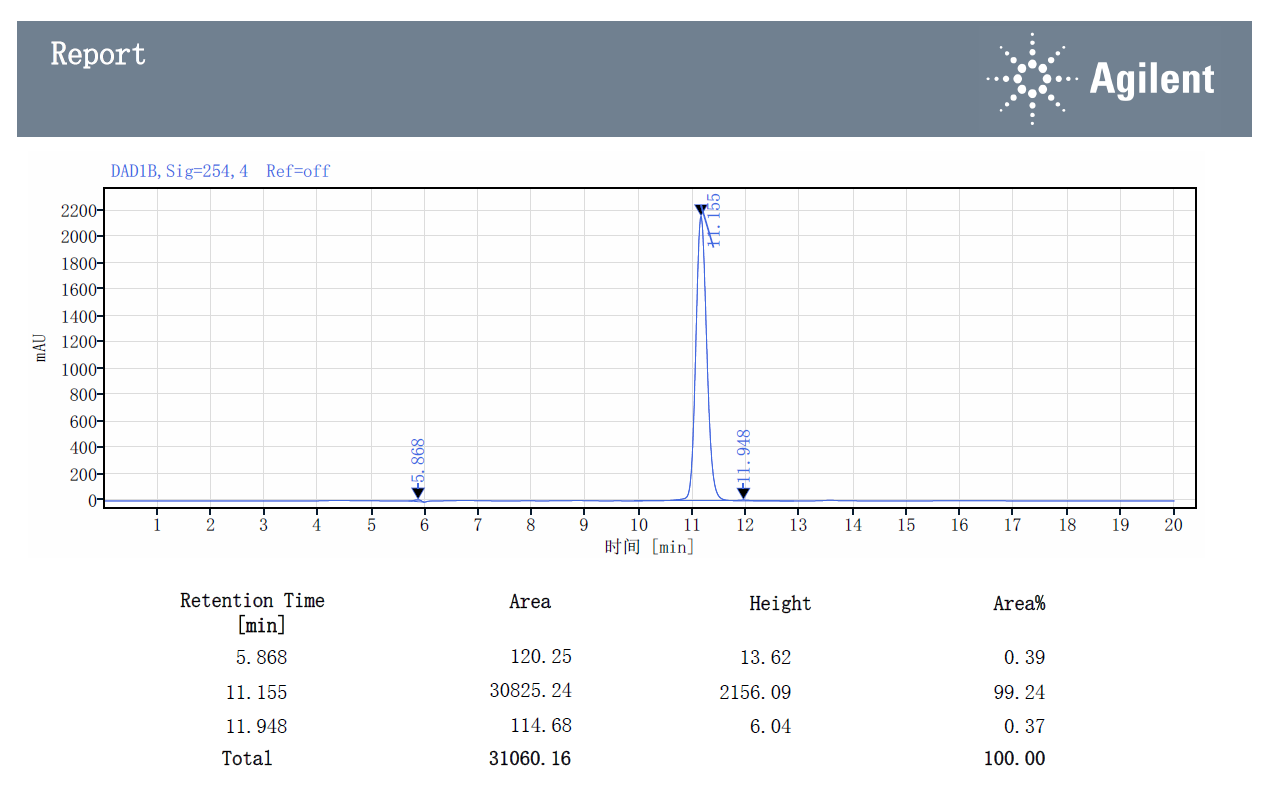


4.2 HPLC trace of compound **5b**:

HPLC Purity: 98.09%; Retention Time: 11.403 min; Instrument: Agilent 1200 with DAD detector; Mobile phase A: H2O (30%); Mobile phase B: MeOH (70%); Column Temp: 30°C; Wavelength: 254 nm.


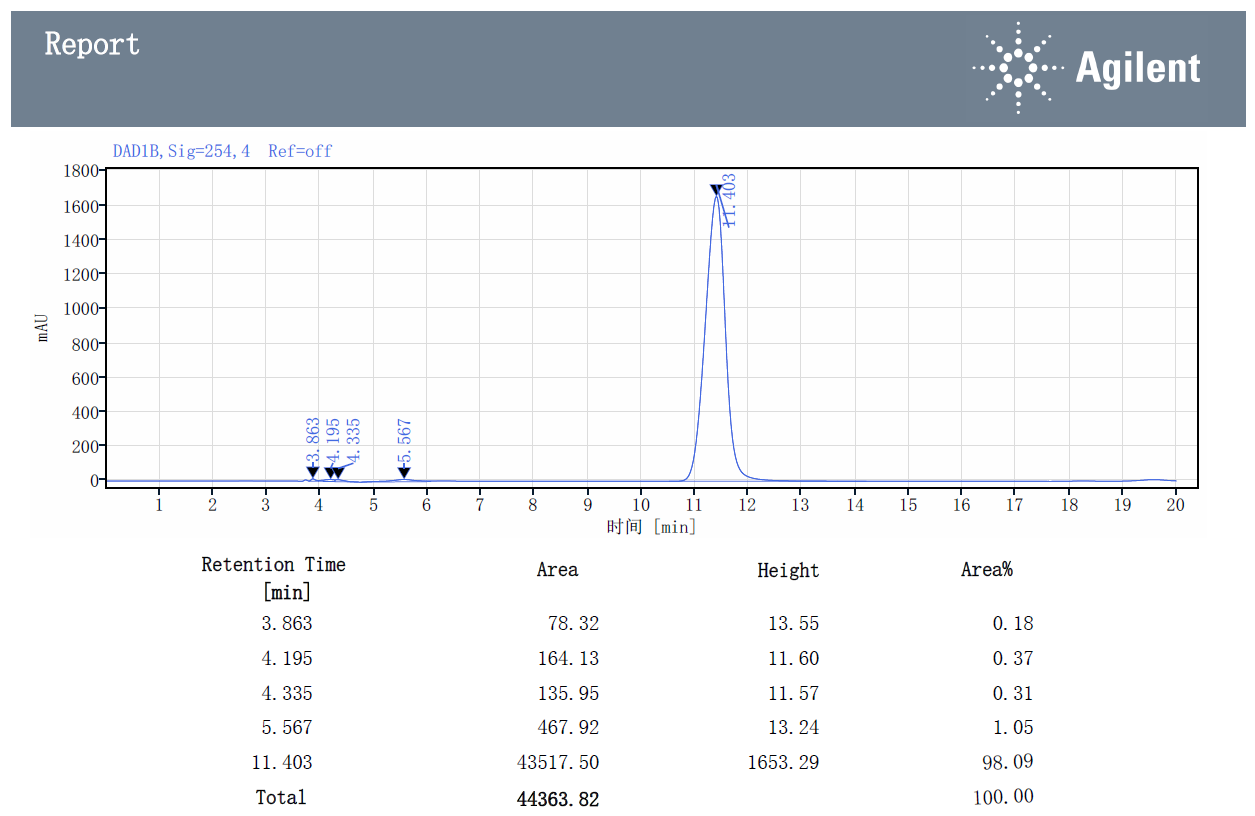


4.3 HPLC trace of compound **5d**:

HPLC Purity: 97.81%; Retention Time: 6.065 min; Instrument: Agilent 1200 with DAD detector; Mobile phase A: H2O (25%); Mobile phase B: MeOH (75%); Column Temp: 30°C; Wavelength: 254 nm.


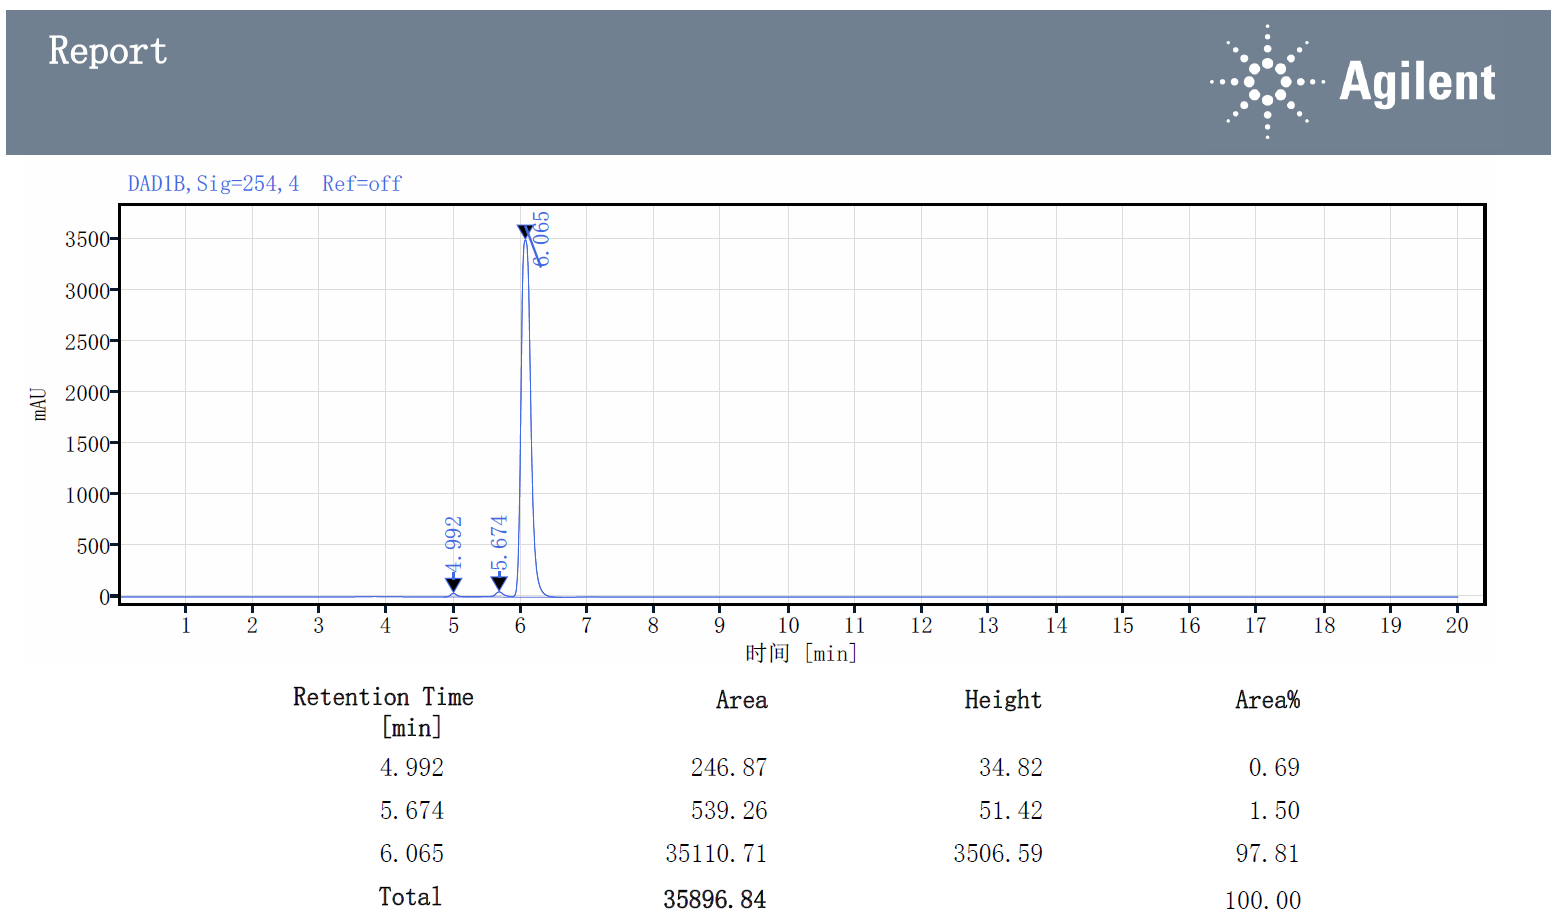


4.4 HPLC trace of compound **5g**:

HPLC Purity: 99.17%; Retention Time: 13.161 min; Instrument: Agilent 1200 with DAD detector; Mobile phase A: H2O (30%); Mobile phase B: MeOH (70%); Column Temp: 30°C; Wavelength: 254 nm.


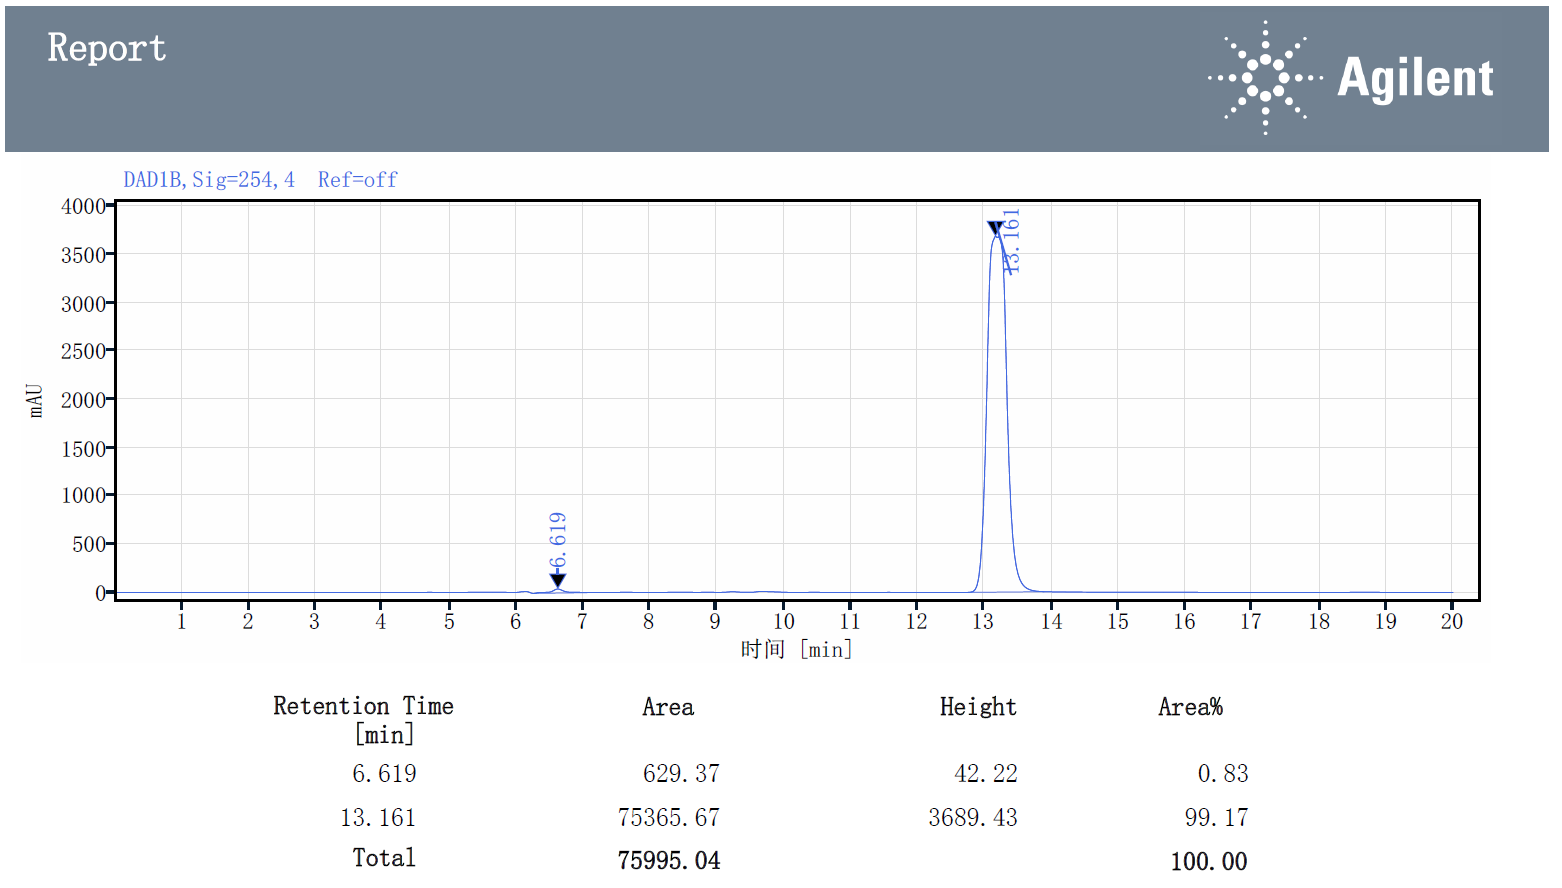


4.5 HPLC trace of compound **5h**:

HPLC Purity: 98.79%; Retention Time: 16.301 min; Instrument: Agilent 1200 with DAD detector; Mobile phase A: H2O (30%); Mobile phase B: MeOH (70%); Column Temp: 30°C; Wavelength: 254 nm.


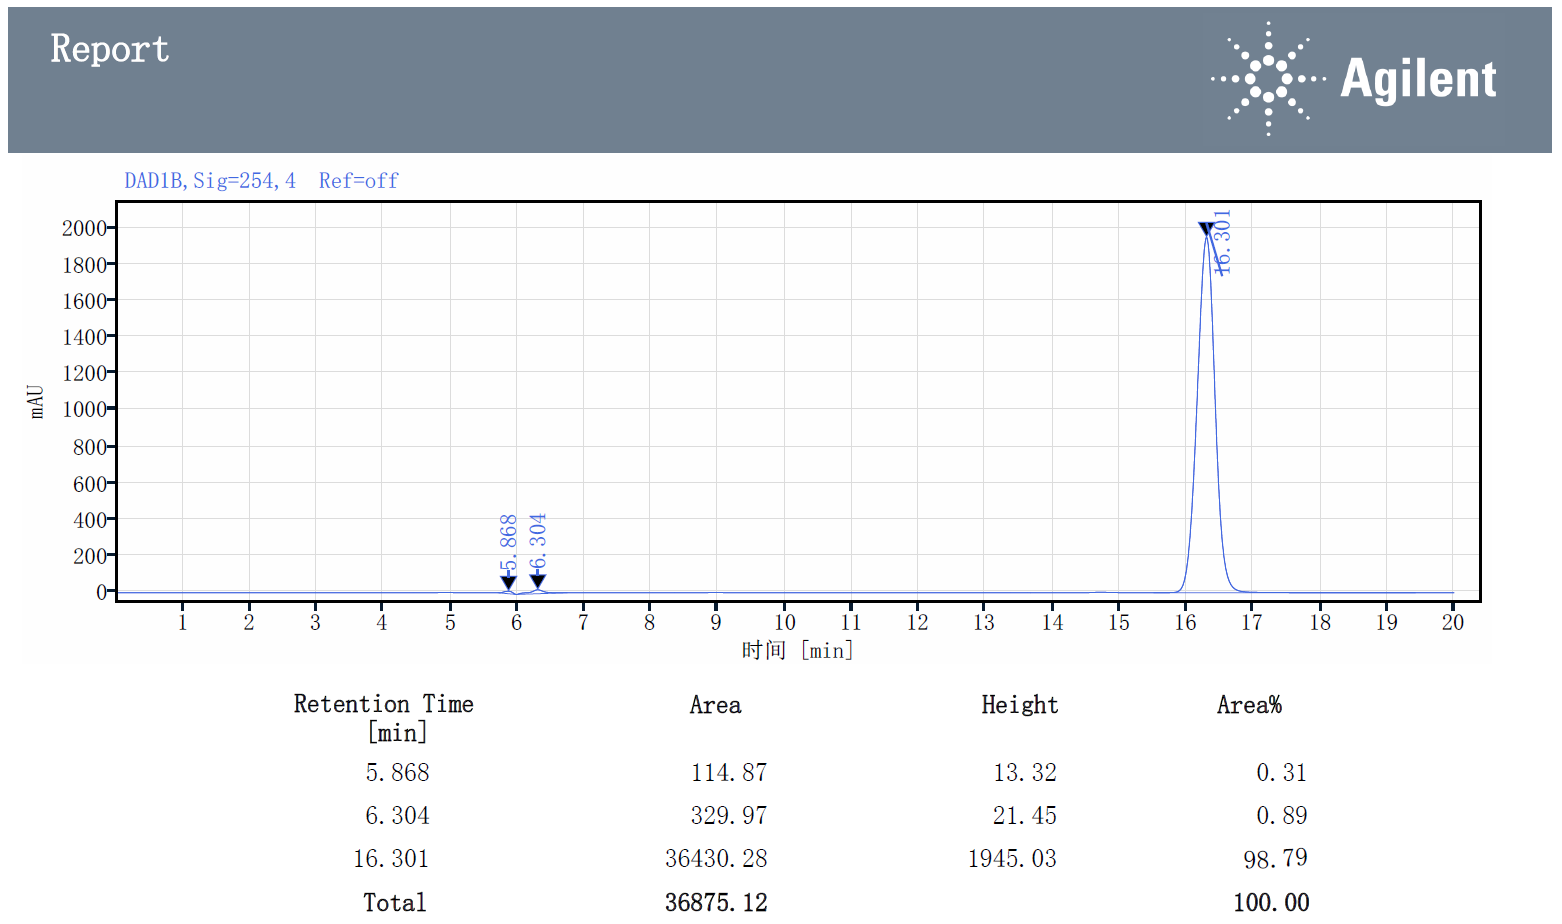


4.6 HPLC trace of compound **5i**:

HPLC Purity: 99.65%; Retention Time: 17.474 min; Instrument: Agilent 1200 with DAD detector; Mobile phase A: H2O (30%); Mobile phase B: MeOH (70%); Column Temp: 30°C; Wavelength: 254 nm.


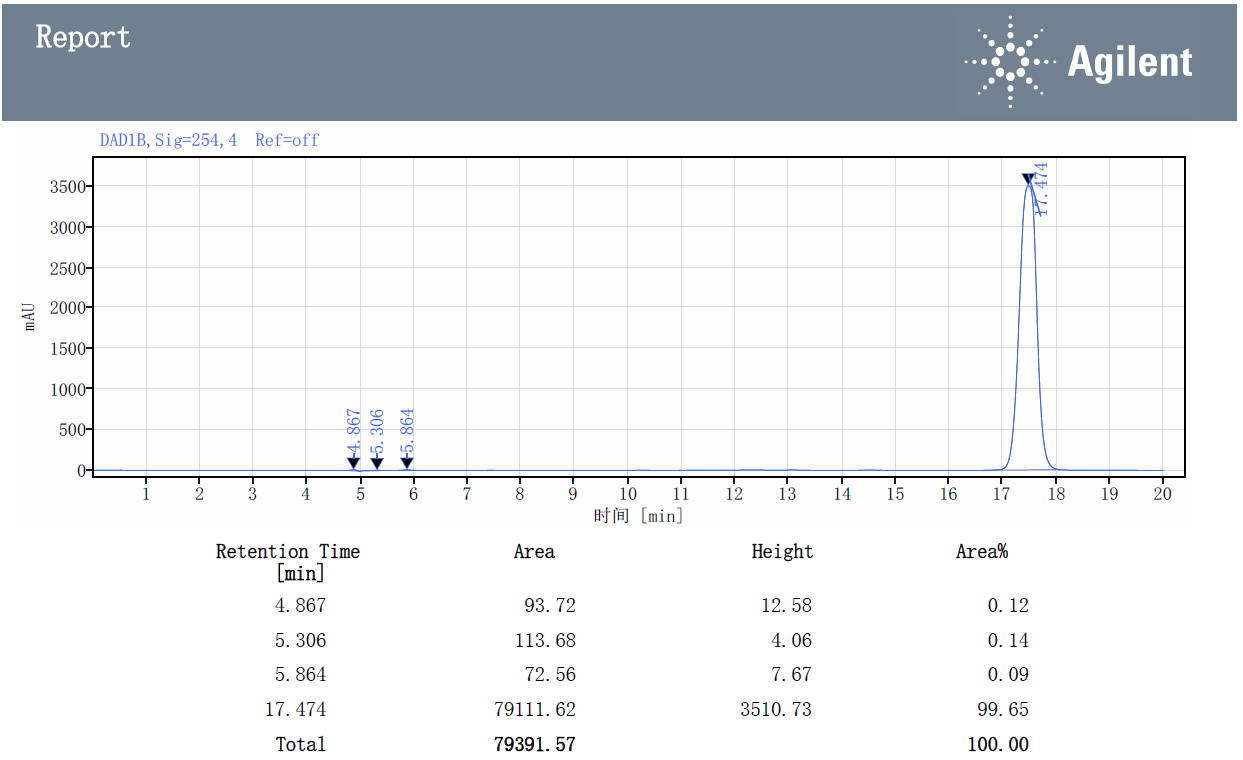


4.7 HPLC trace of compound **5k**:

HPLC Purity: 94.08%; Retention Time: 10.339 min; Instrument: Agilent 1200 with DAD detector; Mobile phase A: H2O (30%); Mobile phase B: MeOH (70%); Column Temp: 30°C; Wavelength: 254 nm.


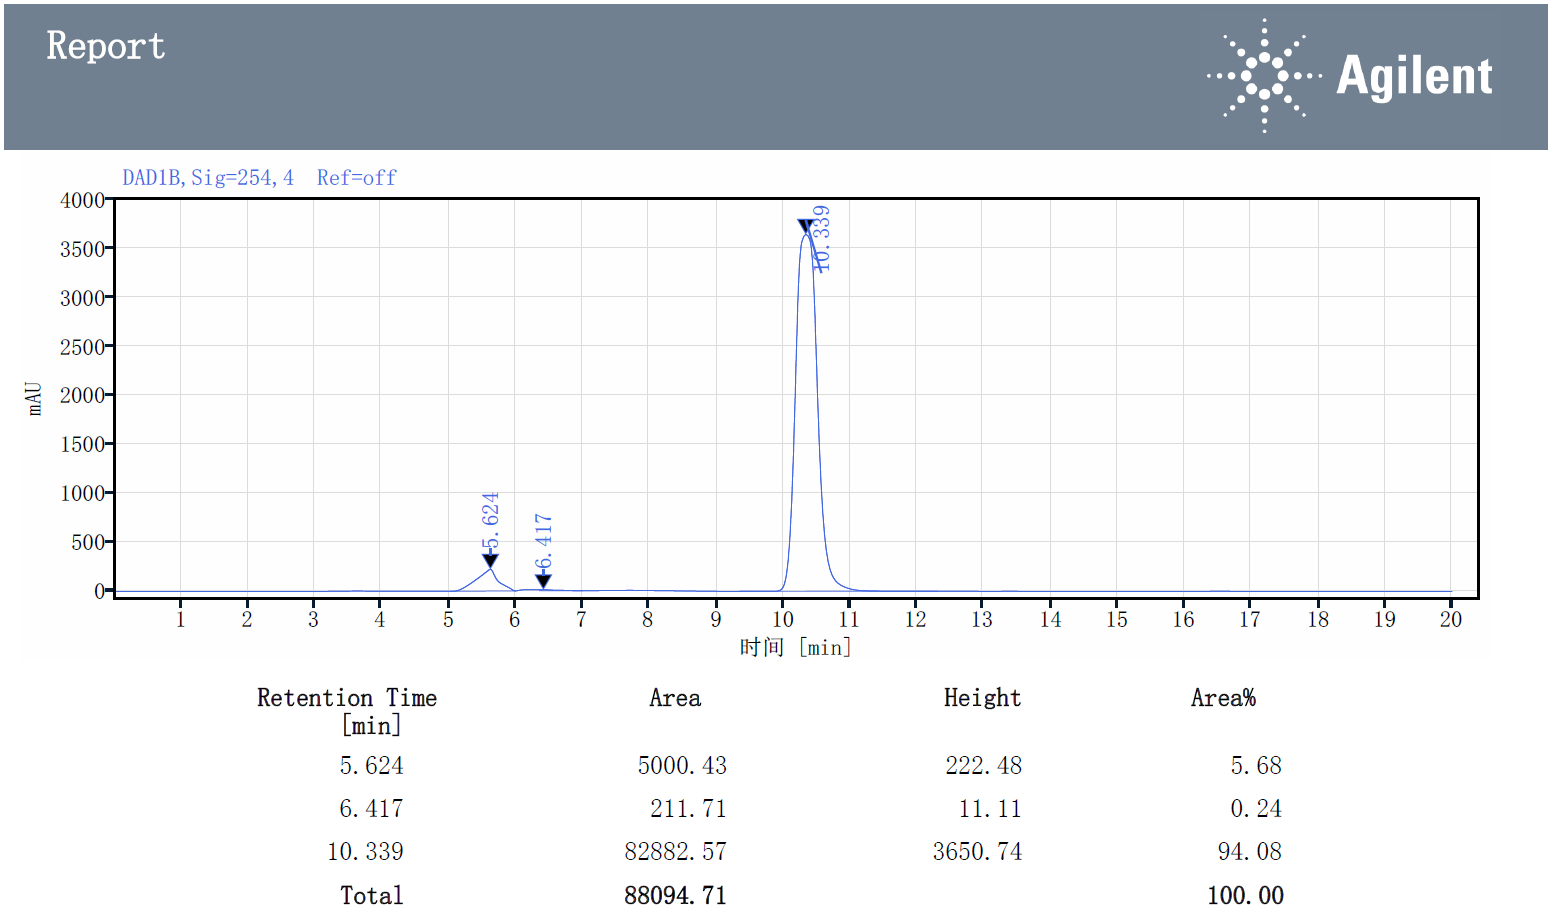


4.8 HPLC trace of compound **5l**:

HPLC Purity: 98.73 %; Retention Time: 12.267 min; Instrument: Agilent 1200 with DAD detector; Mobile phase A: H2O (30%); Mobile phase B: MeOH (70%); Column Temp: 30°C; Wavelength: 254 nm.


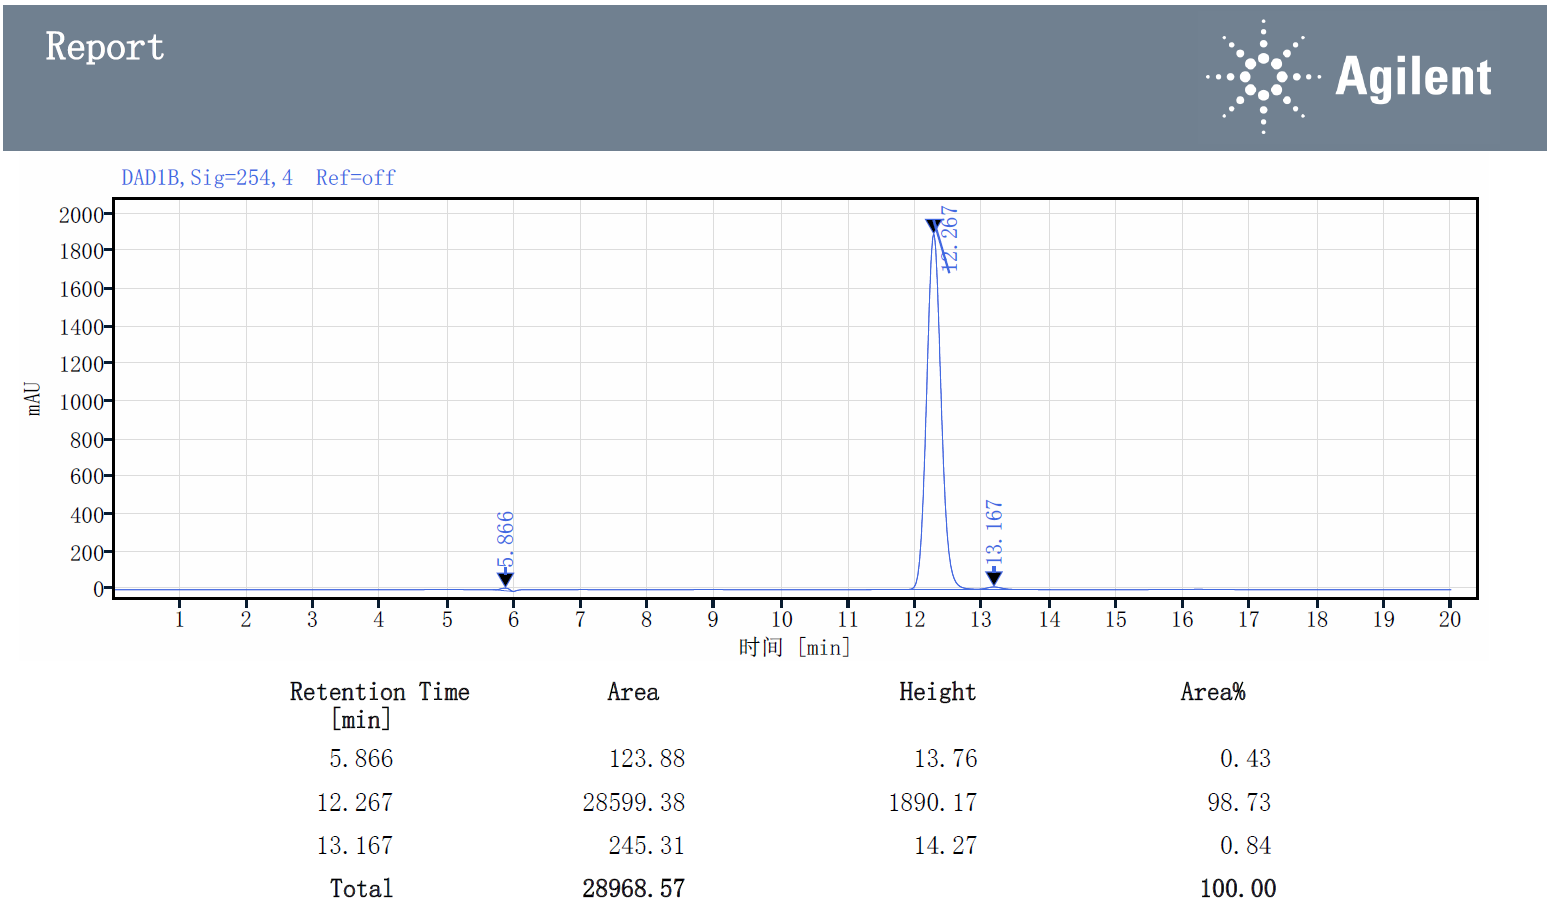


4.9 HPLC trace of compound **5m**:

HPLC Purity: 99.49 %; Retention Time: 18.048 min; Instrument: Agilent 1200 with DAD detector; Mobile phase A: H2O (30%); Mobile phase B: MeOH (70%); Column Temp: 30°C; Wavelength: 254 nm.


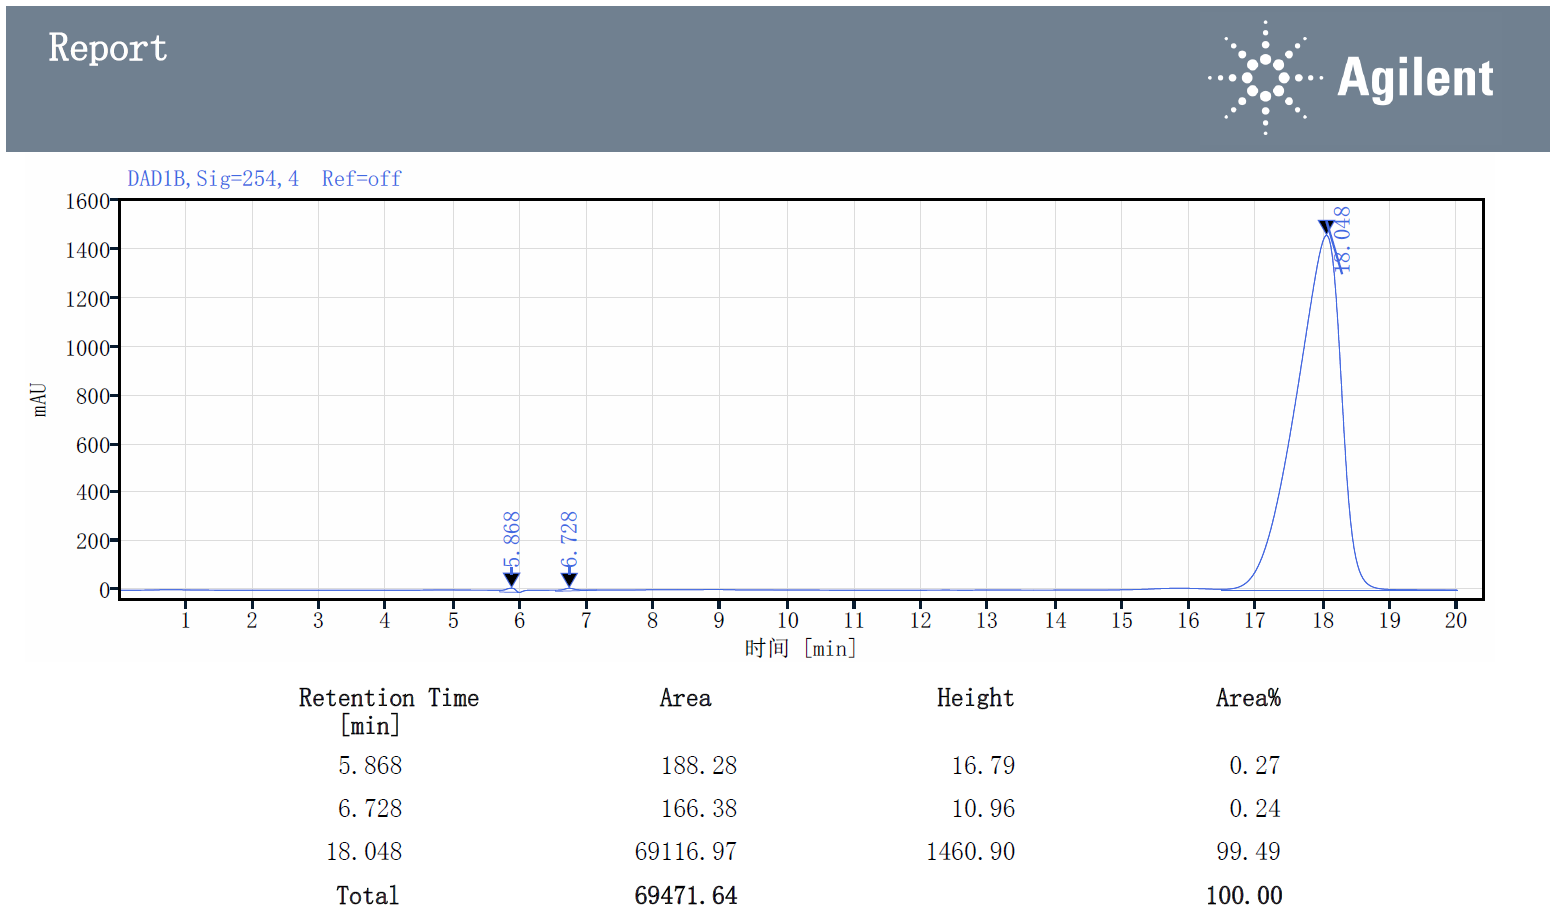


4.10 HPLC trace of compound **6a**:

HPLC Purity: 98.23 %; Retention Time: 14.311 min; Instrument: Agilent 1200 with DAD detector; Mobile phase A: H2O (30%); Mobile phase B: MeOH (70%); Column Temp: 30°C; Wavelength: 254 nm.


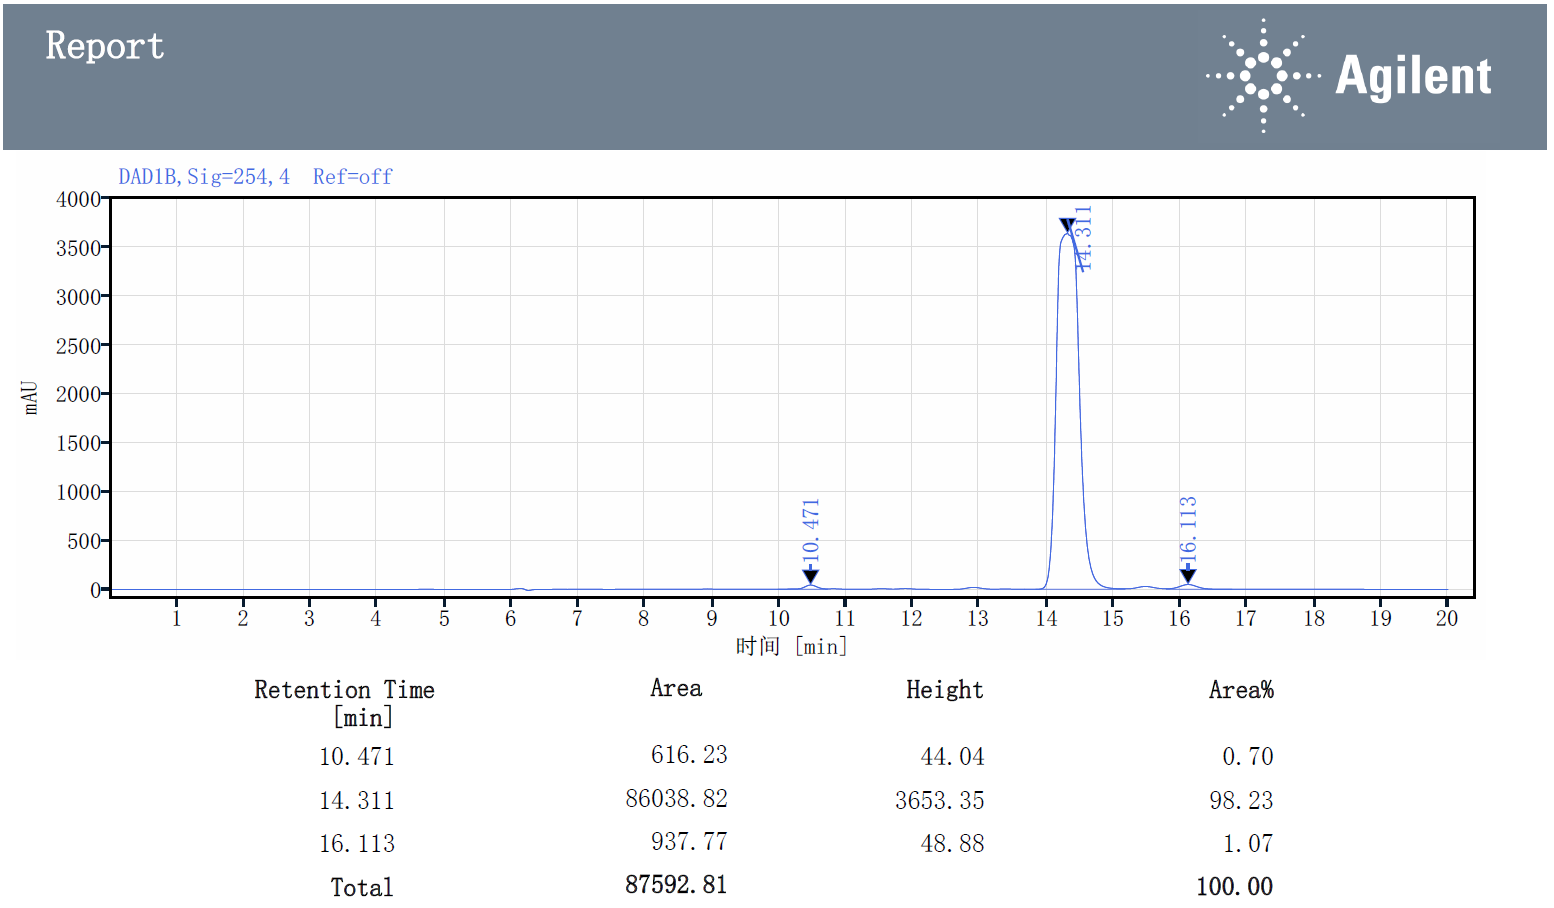


4.11 HPLC trace of compound **6b**:

HPLC Purity: 99.18 %; Retention Time: 10.016 min; Instrument: Agilent 1200 with DAD detector; Mobile phase A: H2O (30%); Mobile phase B: MeOH (70%); Column Temp: 30°C; Wavelength: 254 nm.


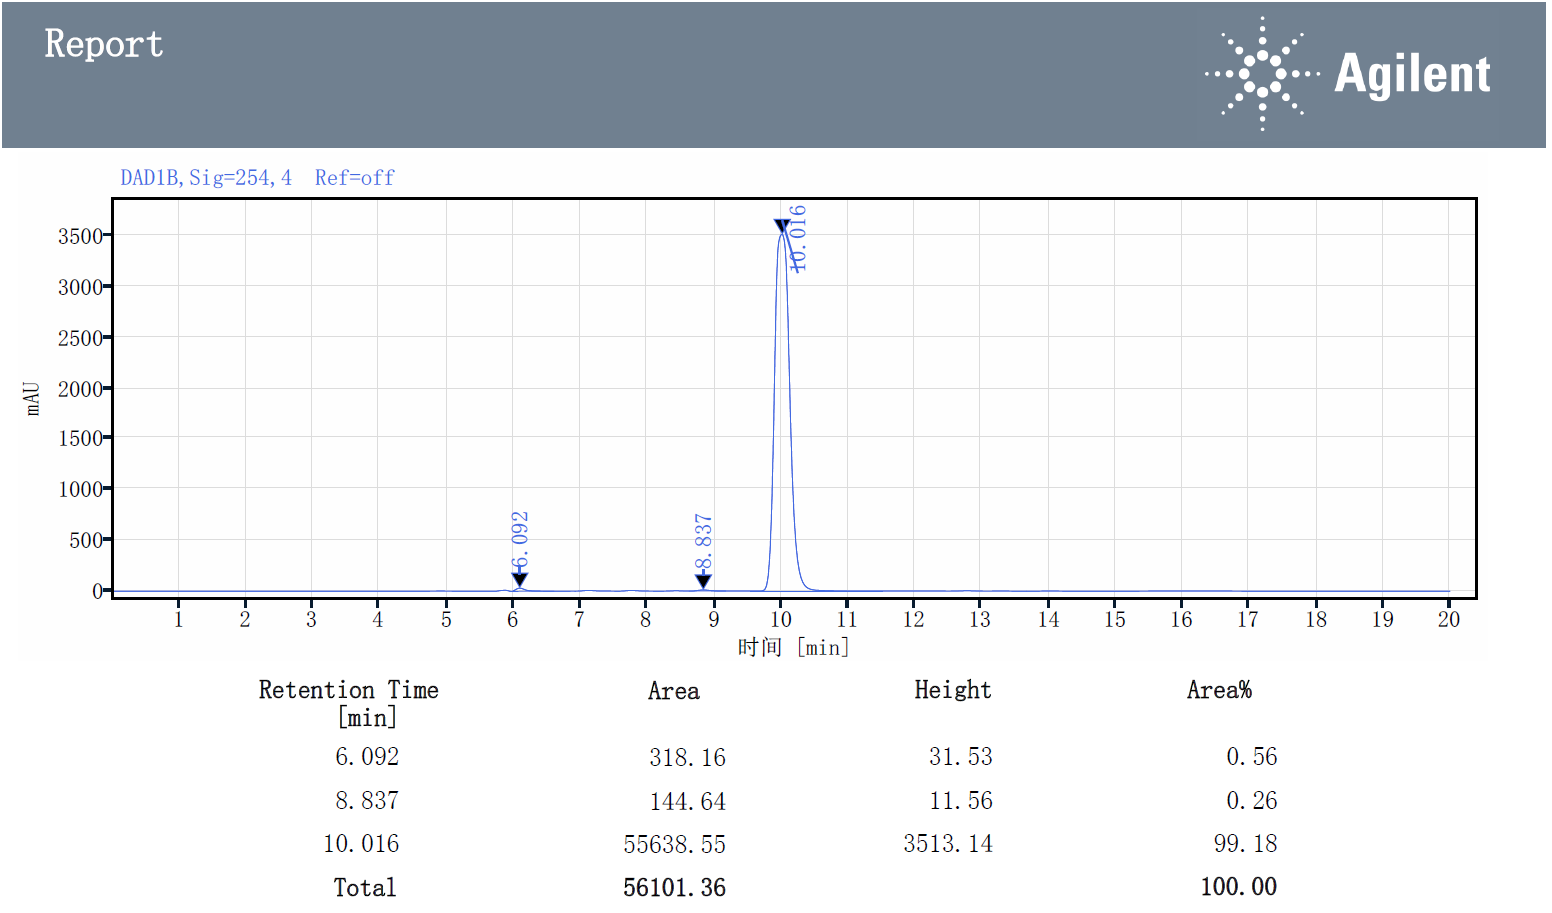


4.12 HPLC trace of compound **6d**:

HPLC Purity: 99.57 %; Retention Time: 9.664 min; Instrument: Agilent 1200 with DAD detector; Mobile phase A: H2O (30%); Mobile phase B: MeOH (70%); Column Temp: 30°C; Wavelength: 254 nm.


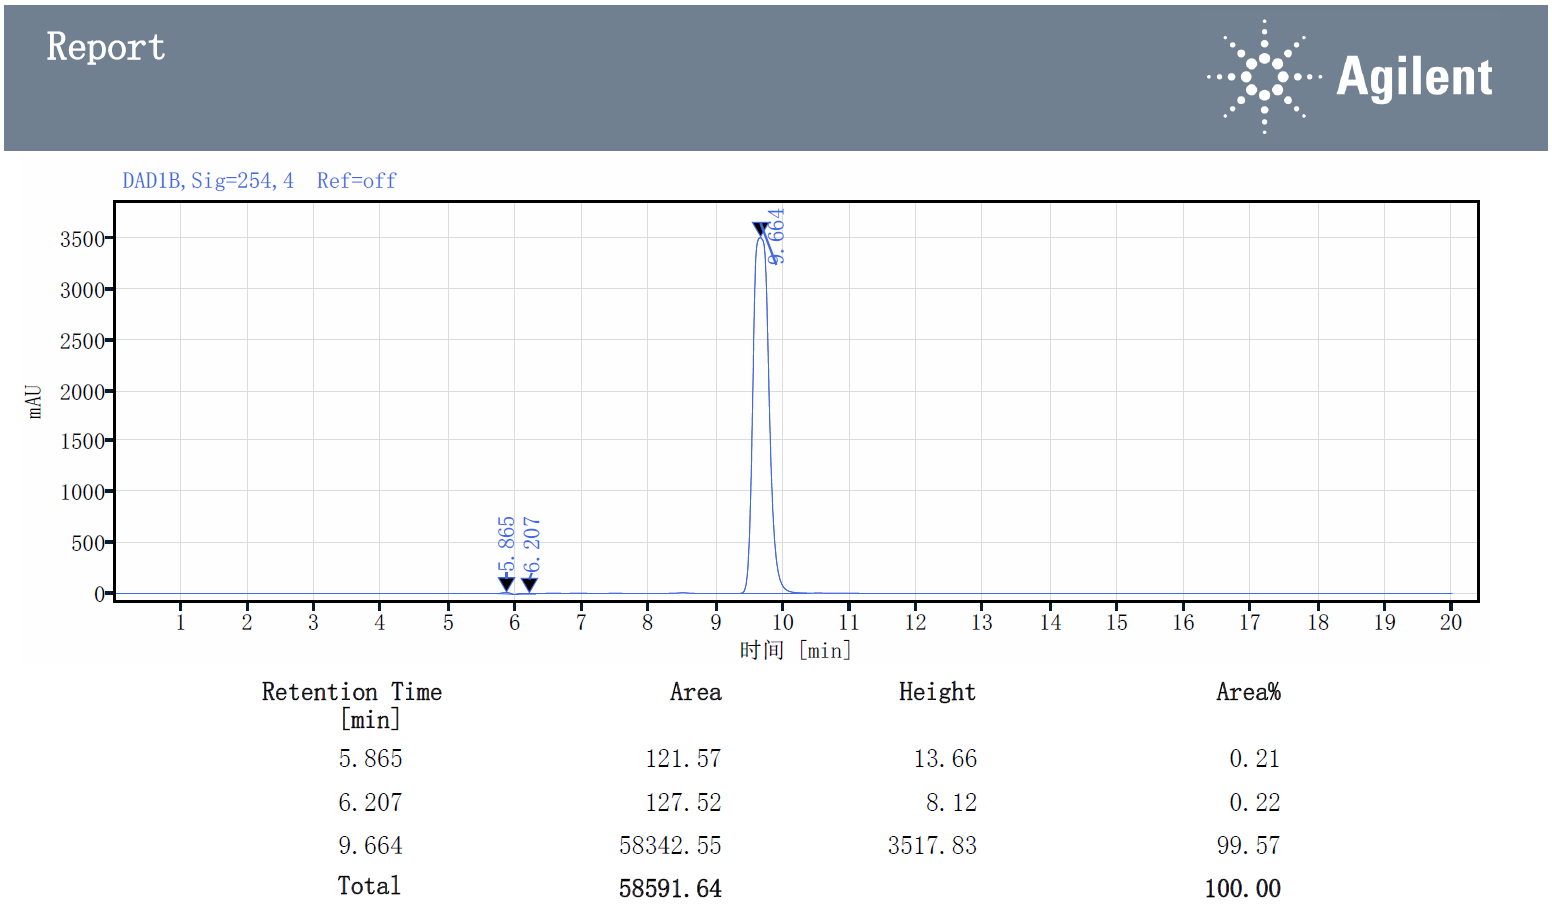


4.13 HPLC trace of compound **6e**:

HPLC Purity: 99.57 %; Retention Time: 13.513 min; Instrument: Agilent 1200 with DAD detector; Mobile phase A: H2O (30%); Mobile phase B: MeOH (70%); Column Temp: 30°C; Wavelength: 254 nm.


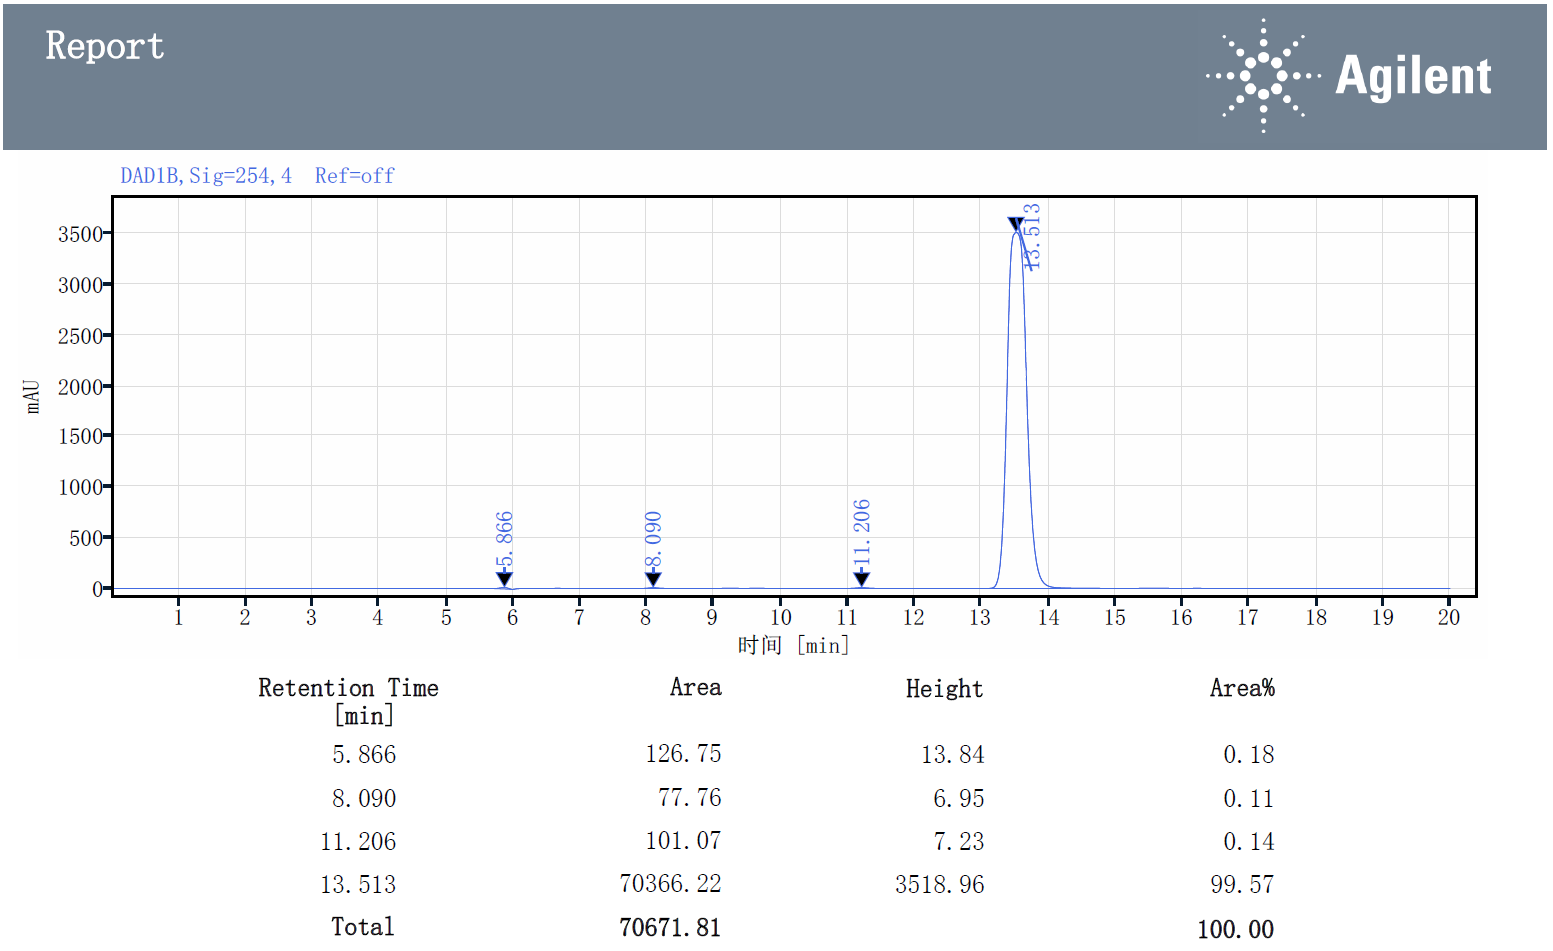


4.14 HPLC trace of compound **7b**:

HPLC Purity: 96.34 %; Retention Time: 12.282 min; Instrument: Agilent 1200 with DAD detector; Mobile phase A: H2O (30%); Mobile phase B: MeOH (70%); Column Temp: 30°C; Wavelength: 254 nm.


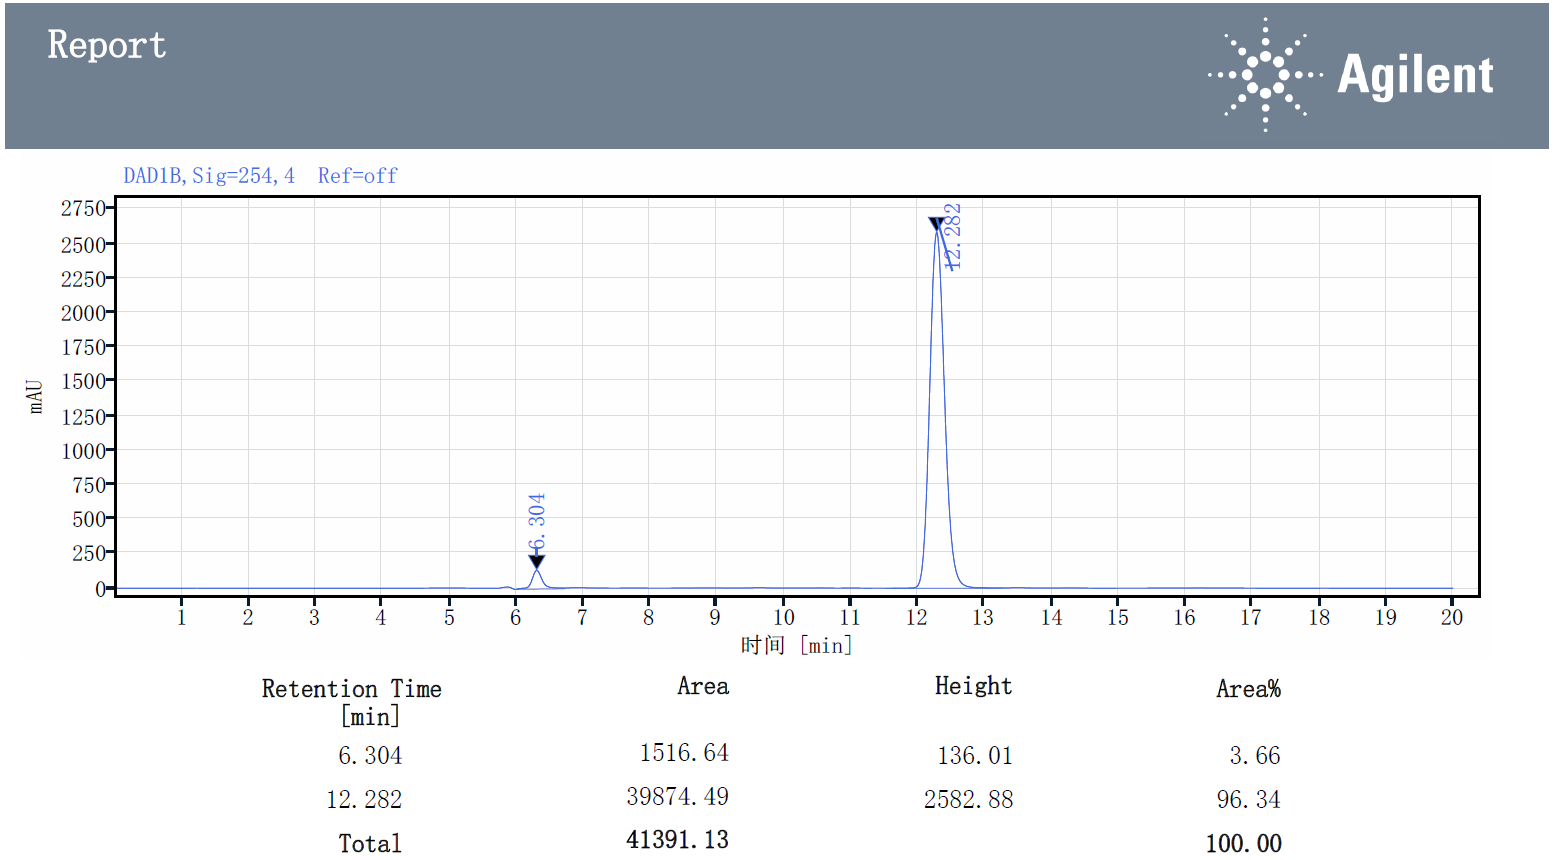


4.15 HPLC trace of compound **7c**:

HPLC Purity: 99.13 %; Retention Time: 11.943 min; Instrument: Agilent 1200 with DAD detector; Mobile phase A: H2O (30%); Mobile phase B: MeOH (70%); Column Temp: 30°C; Wavelength: 254 nm.


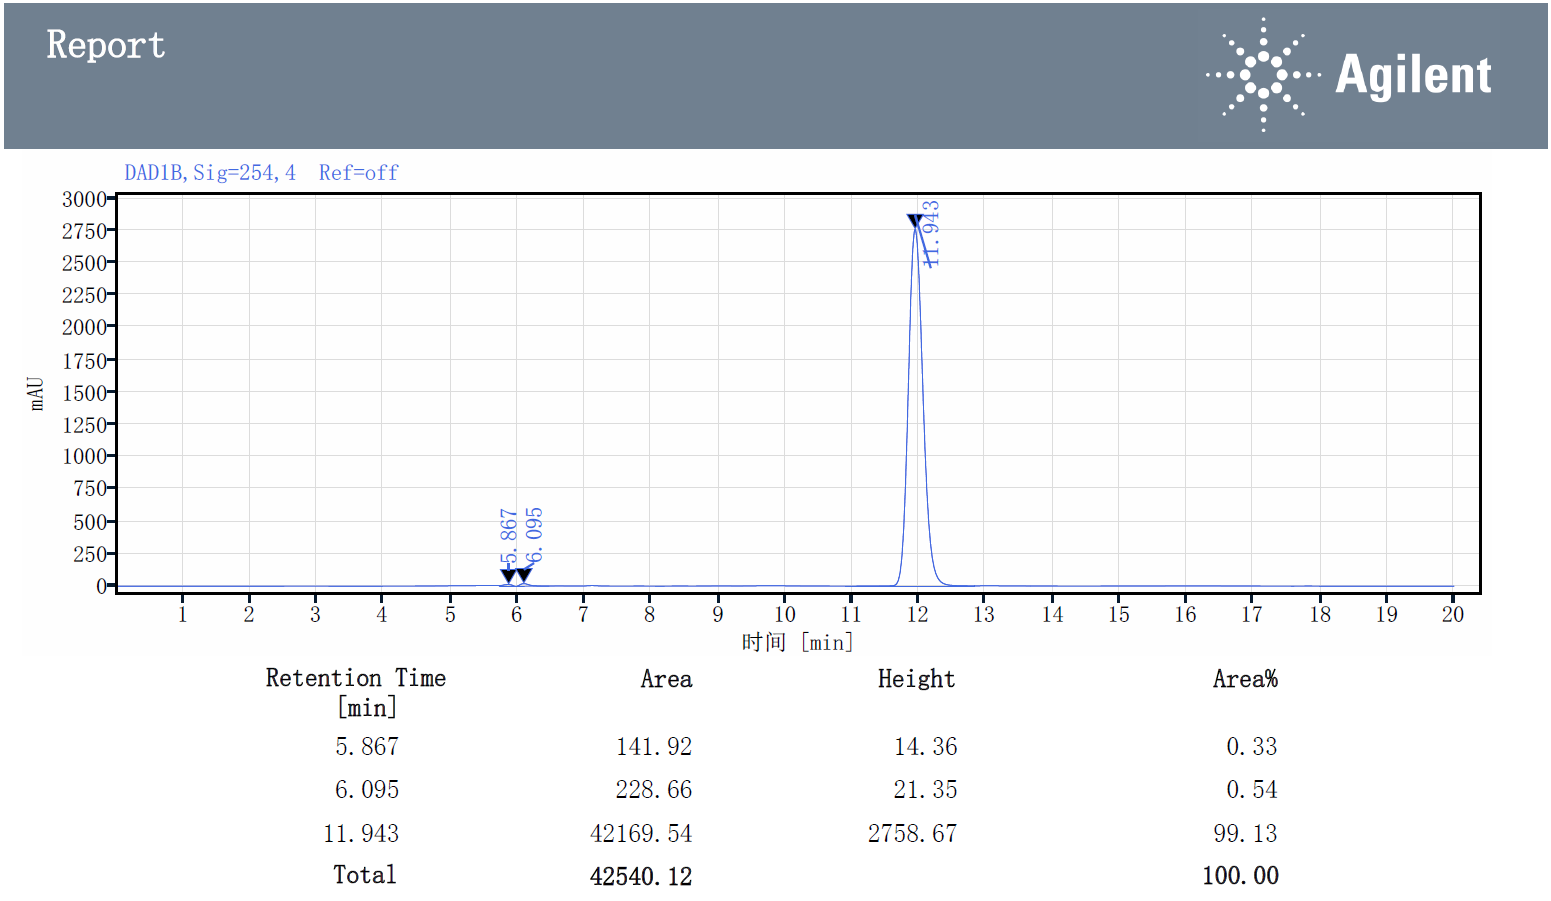


4.16 HPLC trace of compound **7d**:

HPLC Purity: 98.97 %; Retention Time: 10.628 min; Instrument: Agilent 1200 with DAD detector; Mobile phase A: H2O (30%); Mobile phase B: MeOH (70%); Column Temp: 30°C; Wavelength: 254 nm.


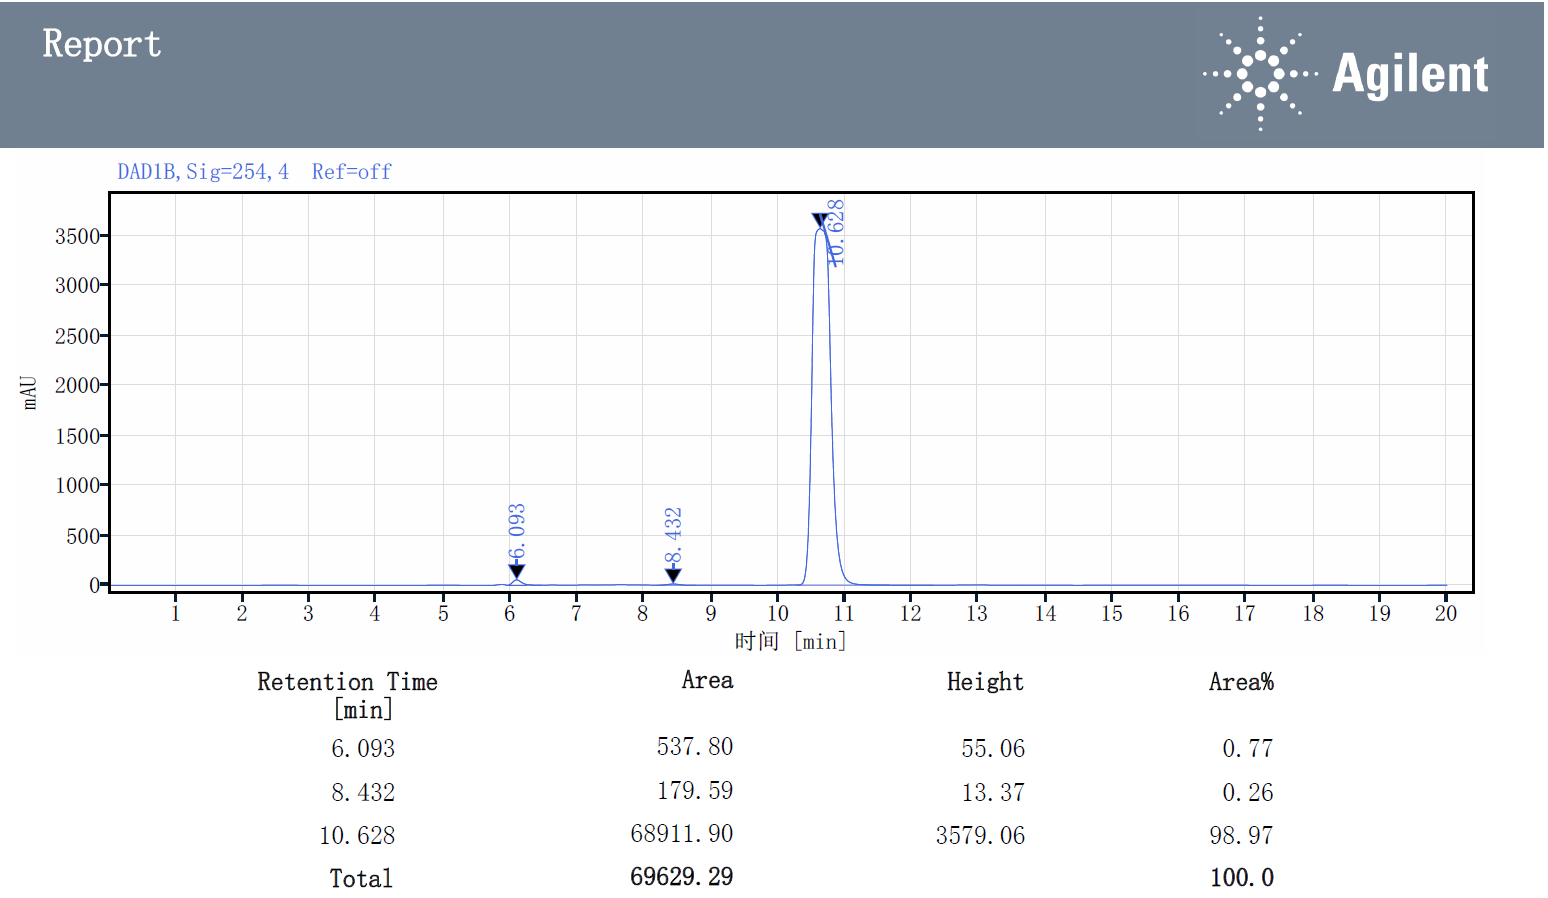


4.17 HPLC trace of compound **7e**:

HPLC Purity: 97.67 %; Retention Time: 12.575 min; Instrument: Agilent 1200 with DAD detector; Mobile phase A: H2O (30%); Mobile phase B: MeOH (70%); Column Temp: 30°C; Wavelength: 254 nm.


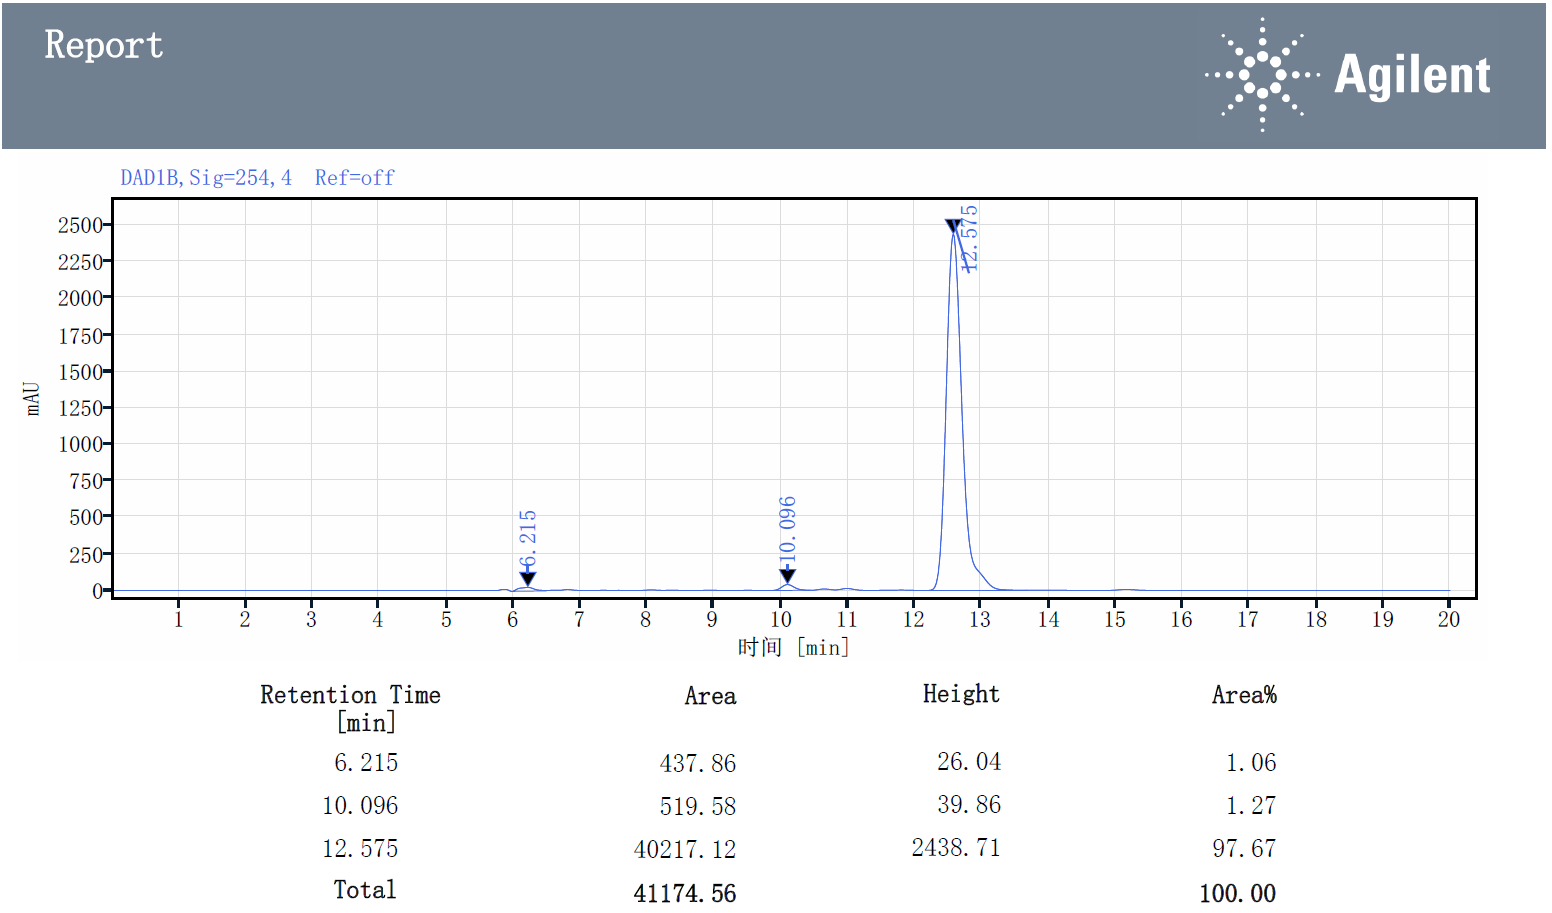


4.18 HPLC trace of compound **7f**:

HPLC Purity: 99.54 %; Retention Time: 12.954 min; Instrument: Agilent 1200 with DAD detector; Mobile phase A: H2O (30%); Mobile phase B: MeOH (70%); Column Temp: 30°C; Wavelength: 254 nm.


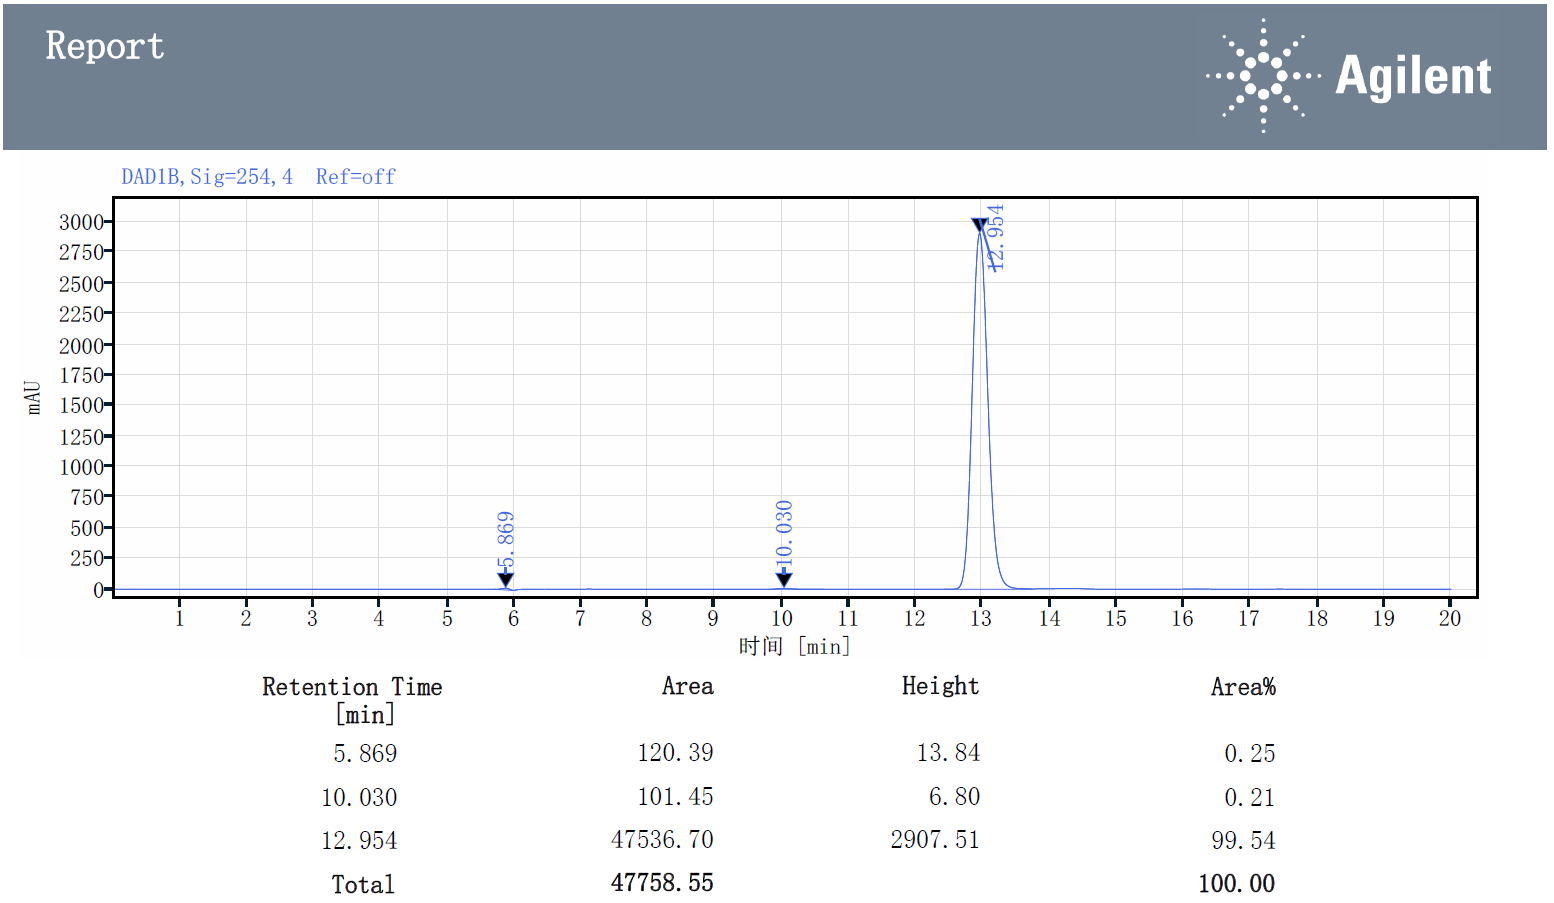


4.19 HPLC trace of compound **7g**:

HPLC Purity: 99.83 %; Retention Time: 10.285 min; Instrument: Agilent 1200 with DAD detector; Mobile phase A: H2O (30%); Mobile phase B: MeOH (70%); Column Temp: 30°C; Wavelength: 254 nm.


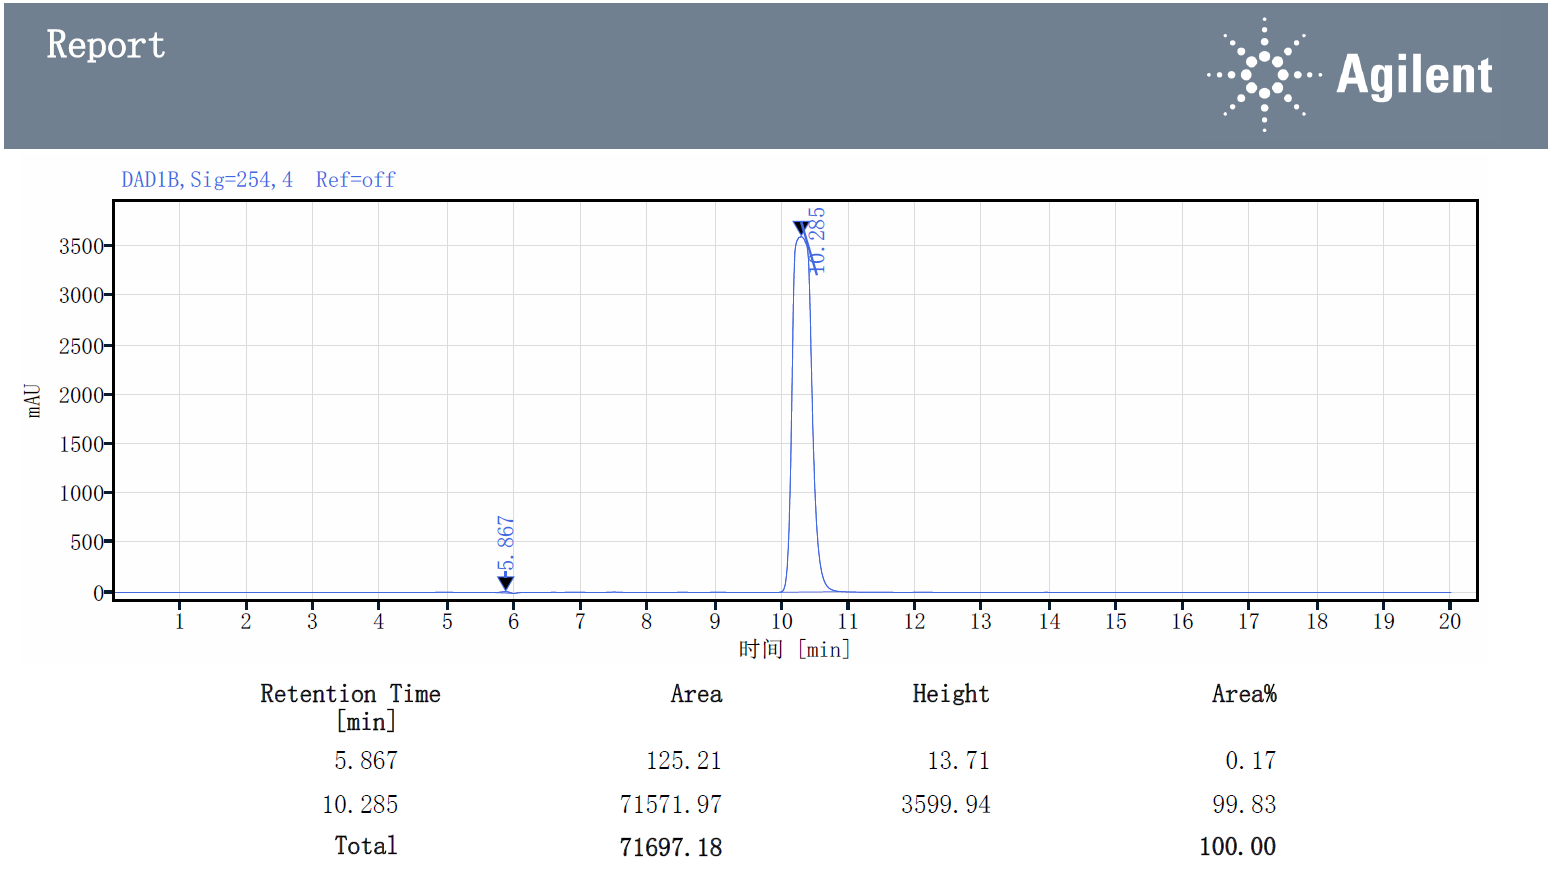


4.20 HPLC trace of compound **7h**:

HPLC Purity: 99.54 %; Retention Time: 18.114 min; Instrument: Agilent 1200 with DAD detector; Mobile phase A: H2O (30%); Mobile phase B: MeOH (70%); Column Temp: 30°C; Wavelength: 254 nm.


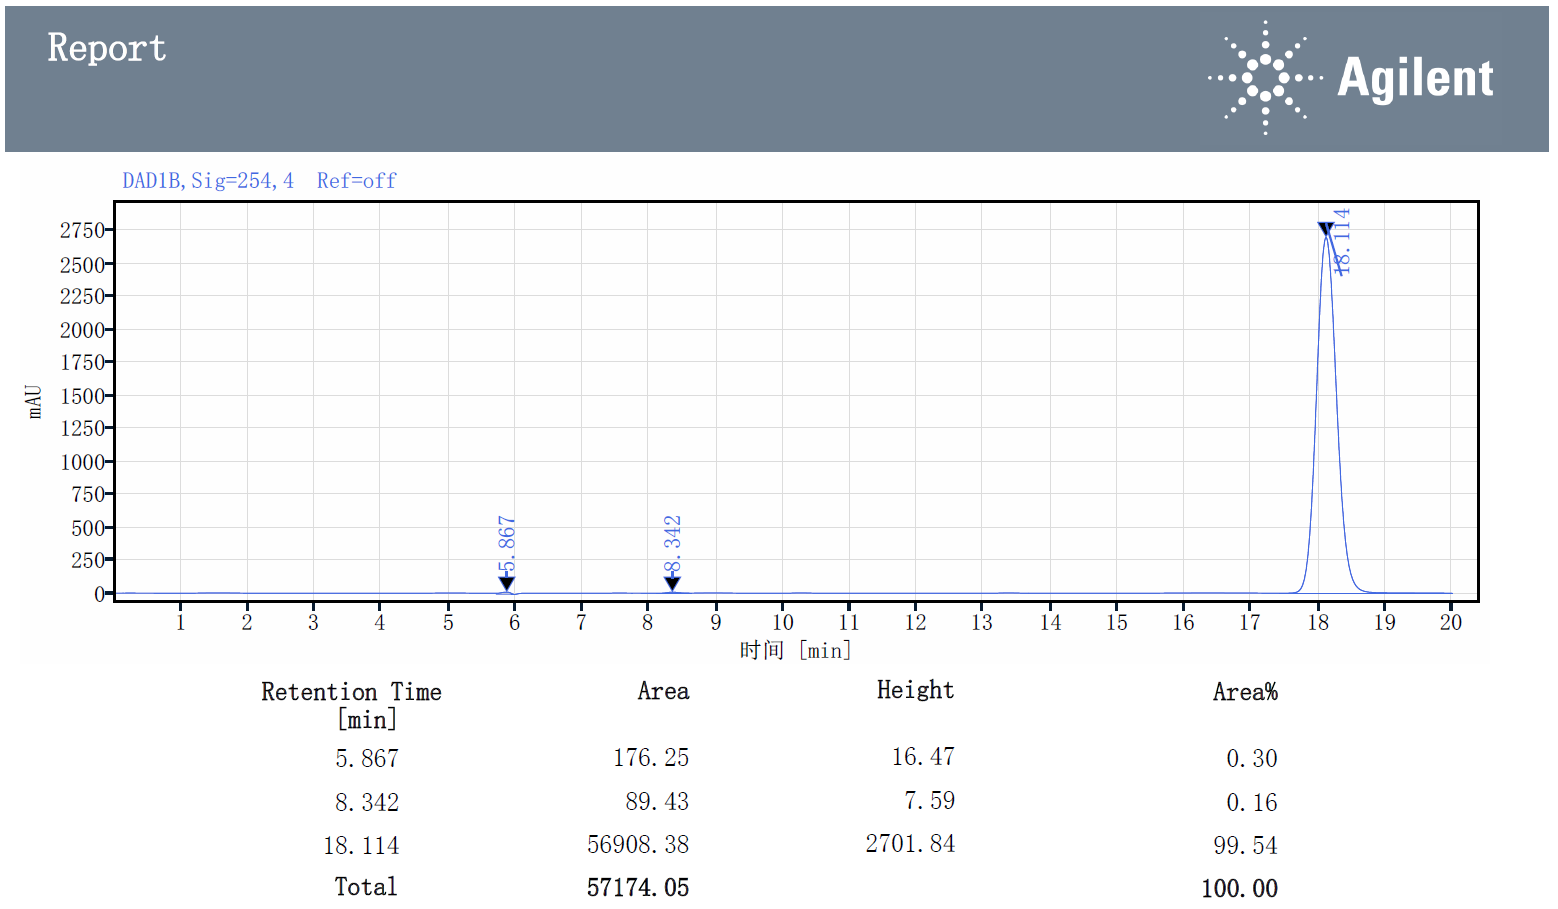

Supplement: Supplementary file 1 [file 28013b79c8fbb7f461123073.docx]
